# Supplementary material for: Utilisation of growth monitoring service by mothers of infants in Mettu town, Southwest Ethiopia
Source: PubMed Central journal article supplement — BMJ Paediatr Open. 2022 Sep 23;6(1):e001588. doi: 10.1136/bmjpo-2022-001588 (PMC9511599; doi:10.1136/bmjpo-2022-001588), 2022-09-23
Supplement: bmjpo-2022-001588.draft_revisions.pdf [file bmjpo-2022-001588.draft_revisions.pdf]

# BMJ Paediatrics Open

BMJ Paediatrics Open is committed to open peer review. As part of this commitment we make the peer review history of every article we publish publicly available.

When an article is published we post the peer reviewers' comments and the authors' responses online. We also post the versions of the paper that were used during peer review. These are the versions that the peer review comments apply to.

The versions of the paper that follow are the versions that were submitted during the peer review process. They are not the versions of record or the final published versions. They should not be cited or distributed as the published version of this manuscript.

BMJ Paediatrics Open is an open access journal and the full, final, typeset and author-corrected version of record of the manuscript is available on our site with no access controls, subscription charges or pay-per-view fees (<http://bmjpaedsopen.bmj.com>).

If you have any questions on BMJ Paediatrics Open's open peer review process please email [info.bmjpo@bmj.com](mailto:info.bmjpo@bmj.com)

# BMJ Paediatrics Open

## Utilization of Growth Monitoring and Promotion Service and Associated Factors among Mothers of Children Aged 0-23 Months Old in Mettu Town, South West Ethiopia

|                               |                                                                                                                                                                                                                                                                        |
|-------------------------------|------------------------------------------------------------------------------------------------------------------------------------------------------------------------------------------------------------------------------------------------------------------------|
| Journal:                      | <i>BMJ Paediatrics Open</i>                                                                                                                                                                                                                                            |
| Manuscript ID                 | bmjpo-2022-001588                                                                                                                                                                                                                                                      |
| Article Type:                 | Original research                                                                                                                                                                                                                                                      |
| Date Submitted by the Author: | 24-Jun-2022                                                                                                                                                                                                                                                            |
| Complete List of Authors:     | Tufa, Yohanis ; Mettu Health Science College, Department of Health Extension Service<br>Mitiku, Abeza; Mettu University, Public Health;<br>Shemsu, Shuayib ; Mittuniversitetet, Department of Public Health<br>Bidira, Kebebe; Mettu University, Department of Nursing |
| Keywords:                     | Adolescent Health, Growth, Obesity                                                                                                                                                                                                                                     |
|                               |                                                                                                                                                                                                                                                                        |

SCHOLARONE™  
Manuscripts

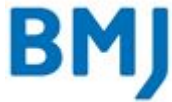

I, the Submitting Author has the right to grant and does grant on behalf of all authors of the Work (as defined in the below author licence), an exclusive licence and/or a non-exclusive licence for contributions from authors who are: i) UK Crown employees; ii) where BMJ has agreed a CC-BY licence shall apply, and/or iii) in accordance with the terms applicable for US Federal Government officers or employees acting as part of their official duties; on a worldwide, perpetual, irrevocable, royalty-free basis to BMJ Publishing Group Ltd ("BMJ") its licensees and where the relevant Journal is co-owned by BMJ to the co-owners of the Journal, to publish the Work in this journal and any other BMJ products and to exploit all rights, as set out in our [licence](#).

The Submitting Author accepts and understands that any supply made under these terms is made by BMJ to the Submitting Author unless you are acting as an employee on behalf of your employer or a postgraduate student of an affiliated institution which is paying any applicable article publishing charge ("APC") for Open Access articles. Where the Submitting Author wishes to make the Work available on an Open Access basis (and intends to pay the relevant APC), the terms of reuse of such Open Access shall be governed by a Creative Commons licence – details of these licences and which [Creative Commons](#) licence will apply to this Work are set out in our licence referred to above.

Other than as permitted in any relevant BMJ Author's Self Archiving Policies, I confirm this Work has not been accepted for publication elsewhere, is not being considered for publication elsewhere and does not duplicate material already published. I confirm all authors consent to publication of this Work and authorise the granting of this licence.

Original Research Article

## Utilization of Growth Monitoring and Promotion Service and Associated Factors among Mothers of Children Aged 0-23 Months Old in Mettu Town, South West Ethiopia

Yohannes Tufa<sup>1</sup>, Abeza Mitiku<sup>2</sup>, Shuayib Shemsu<sup>2</sup>, Kebebe Bidira<sup>3</sup>

<sup>1</sup> Department of Health Extension Service , Mettu Health Science College, Mettu, Ethiopia

<sup>2</sup> Department of Public Health, College of Health Science, Mettu University, Mettu, Ethiopia

<sup>3</sup> Department of Nursing , College of Health Science, Mettu University, Mettu, Ethiopia

Correspondence should be addressed to Abeza Mitiku ; [abzmtk@gmail.com](mailto:abzmtk@gmail.com)

### Abstract

**Background:** Growth monitoring and promotion (GMP) is a preventive activity comprised of growth monitoring (GM) that serves as the core activity in an integrated child health and nutrition program. In most developing nations, including Ethiopia, however, the use of growth monitoring and promotion services is insufficient. Hence, the purpose of this study was to evaluate the use of GMP services and associated characteristics among women with children aged 0–23 in Mettu, Southwest Ethiopia.

**Objective:** To assess utilization of growth monitoring and promotion service and associated factors among mothers with children aged 0-23 months old in Mettu town, South West Ethiopia, 2021.

**Method:** A community-based cross-sectional study was conducted among 372 randomly selected mothers with children aged 0–23 months old from June 25 to July 27, 2021 in Mettu town. Epi-data version 4.6.0 was used to enter data, which was then exported to SPSS version 25 for analysis. Bivariate and multivariate logistic regression were performed to identify factors associated with GMP utilization.

**Results:** A total of 372 study participants were included in the study yielding a response rate of 95.2%. The proportion of GMP utilization was 25.2% [95% CI: 24.1-33.0]. In multivariable regression analysis, Age of index child 0-11 months [AOR=1.58; (95% CI: 1.052, 3.713)], early-PNC [AOR=1.72; (95% CI=1.657, 6.467)], middle tertile wealth status [AOR=0.108; (95% CI 0.047-0.319)] and lower tertile wealth status [AOR=0.073; (95% CI (0.013-0.874)], family health card [AOR=2.09; (95% CI; 1.384, 5.343)] and time to reach health facility [AOR=2.23; (95%CI: 2.061, 7.350)] were significantly associated with GMP service utilization.

**Conclusion and recommendation:** In this study, only one-fourth of mothers with children aged 0–23 months old were utilizing GMP services. GMP service utilization was found to be significantly associated with child age, early-PNC, wealth status, family health card, and time to reach nearby health facility. Hence, utilization of family health cards and early-PNC should be encouraged both at institutional and community level.

**Key words:** Growth Monitoring, Utilization, Mettu town, Children Aged 0-23Months

## 1. Introduction

Growth monitoring is defined as the regular measuring, plotting, and interpreting child's growth on a regular basis in order to counsel or intervene when abnormal growth is found, with the goal of improving the child's nutritional status[1]. Improved nutritional status, increased utilization of the health services, and ultimately reduction in mortality are the main expected benefits of growth monitoring and promotion [2].

The majority of growth monitoring and promotion takes place in health institutions or in communities. The main benefit of growth monitoring is that it assists families and community workers in recognizing children with growth failure early, when it is easier to intervene[3–5].

Child growth and development is one of the most serious public health issues in low and middle income countries[6]. Poor child growth is associated with increased child mortality due to severe infections and increased vulnerability to common childhood illnesses, which contributes to the majority of deaths among children under the age of five[7]. Malnutrition is directly or indirectly responsible for about half of all childhood deaths worldwide [8]. In 2019, there were 149 million children under the age of five in the world. Out of those, 49 million were stunted, 17 million were severely wasted, and 40 million were overweight [9].

Child malnutrition is a major public health problem in Ethiopia. According to the Ethiopian Demographic and Health Survey, 37% of children under the age of five were stunted, 21% were underweight, and 7% were wasted. Similarly, in the Oromia region, 35.6% of children were stunted, 16.1% were underweight, and 4.7% were wasted[10]. In terms of the country's economic losses, the estimated annual costs of child malnutrition are 55.5 billion Ethiopian birr (ETB), or 16.5% of GDP[11].

The most cost-effective way to address the pressing public health issue of malnutrition is to prevent it through the use of various preventive techniques, including GMP. That means ensuring that all

1  
2  
3 children who are normal weight at birth remain in that range, and that those who are low weight at  
4 birth are quickly brought into a healthy growth range[3].  
5  
6

7 It is critical to promote and improve a child's health during the window of opportunity, which runs  
8 from conception to the child's second birthday[12]. Despite the fact that GMP is one of the activities  
9 that the Ethiopian government is currently focusing on to combat child malnutrition, only a few  
10 mothers brought their children for this service [13] ,[14]. Studies done in different parts of Ethiopia  
11 revealed that only 16.9-38.9% proportion of mothers were attending GMP service [14–19]. Lack of  
12 appropriate information about GMP service, lack of support from husbands, distance from the health  
13 facility, pastoral life style and cultural issues such as the consideration of “evil eye” were factors  
14 contributed for utilization of GMP service[17, 20].  
15  
16  
17  
18  
19  
20

21 The irregularity of the GMP session due to health extension work load, not recording the age and  
22 weight of the child accurately, mother's wrong belief and skill gap of health extension workers were  
23 challenges of GMP utilization [17]. Since 2008, Ethiopia has adopted GMP as a nutrition-specific  
24 intervention, but utilization of growth monitoring and promotion services has been restricted[13].  
25  
26  
27  
28

29 However, limited evidence is available on the level of utilization of the GMP services in Mettu town.  
30 Hence, this study intended to find out how widely GMP services are being utilized and what factors  
31 affected the program in the Mettu town.  
32  
33  
34

## 35 **2.1. Study area and period**

36  
37 The study was conducted in Mettu town from June 25 to July 27/2021 which is found in I/A/Bor  
38 Zone, Oromia region, South West Ethiopia and located 542 km from Addis Ababa, the capital city of  
39 Ethiopia. Mettu is a market town with six administrative kebeles. One health center, one specialized  
40 hospital, and three health posts are found in the town. The total population of the town is estimated to  
41 be 49,538. Under five and under two age groups were estimated to be 8,139 and 2,828 respectively.  
42  
43  
44  
45  
46

## 47 **2.2. Study design and Population**

48  
49 Community-based cross-sectional study was employed from June 25to July 27/2021. All mothers  
50 who have children aged 0-23 months old and live in Mettu town were the source population ,whereas  
51 mothers who have children aged 0-23 and fully meeting the inclusion criteria were the study  
52 population and included in the study. Mothers who were unable to respond due to medical or  
53 psychiatric illness were excluded.  
54  
55  
56  
57  
58  
59  
60

### 2.3. Sample size Determination

The minimum required sample size was calculated using a double population proportion formula using Epi Info™ version 7 by considering the assumptions (80% ) power of the study, 95% confidence level, 1:1 ratio) and proportion of outcome for the variable, place of delivery (33.33% exposed and 10.33% non-exposed). After adding a **10%** none response rate the final sample size for the study was **372**(table 1).

**Table 1: Sample size determination to assess the utilization of GMP among mothers of children aged 0-23 months old in Mettu town, South West Ethiopia 2021.**

| S/<br>N | Variable                                 | Assumptions |              |       |      |                             |                | Sample<br>size | Reference |
|---------|------------------------------------------|-------------|--------------|-------|------|-----------------------------|----------------|----------------|-----------|
|         |                                          | CI<br>(%)   | Power<br>(%) | Ratio | AOR  | Proportion<br>of<br>outcome |                |                |           |
|         |                                          |             |              |       |      | Exposed                     | Non<br>exposed |                |           |
| 1.      | Place of delivery                        | 95          | 80           | 1:1   | 3.0  | 33.33%                      | 10.33%         | 372            | [18]      |
| 2.      | Family health card                       | 95          | 80           | 1:1   | 5.09 | 57.86%                      | 11.14%         | 139            | [20]      |
| 3.      | Distance from near<br>by health facility | 95          | 80           | 1:1   | 4.53 | 33.90%                      | 8.0%           | 359            | [19]      |

### 2.4 Sampling techniques and procedures

All six urban kebeles were included in the study to achieve the desired sample size. Initially, a sampling frame containing a list of 2,828 containing mothers-child pairs aged 0-23 months old along with child's date of birth and house number was obtained from the respective health posts. Then samples representing each kebele were calculated using proportion to population size allocation.

Finally, a simple random sampling technique was employed using computer generated program (Microsoft-excel) to select a total of 372 samples from the six urban kebeles.

### 2.5 Data collection procedures and tools

Data were collected from mothers using a semi-structured interviewer administered questionnaire. The questionnaire was adapted from previous similar studies [17], [20], [22]. The questionnaire was first prepared in English and then translated to Afan Oromo and back to English to check the consistency by an expert who had a good ability of both languages. The questionnaire was divided into five sections: socio-demographic and economic information, child and maternal health

1  
2  
3 characteristics and mother-child feeding knowledge, maternal knowledge of the WHO growth chart  
4 and GMP service, and the availability and accessibility of health services.  
5  
6

7  
8 Data were collected by house to house visit using interviewer-administered semi-structured  
9 questionnaire the younger child from the household was taken as an index child, and if twin children  
10 were found within one household, data were taken from one of them using lottery method. If eligible  
11 mother was absent during the data collection period, revisit was done three times, and mothers absent  
12 on the third visit were considered as non-respondent.  
13  
14  
15

## 16 17 18 **2.6 Data quality control**

19  
20 Before data collection, the questionnaires were pretested on a 5% (20) sample size in another town,  
21 which was not part the actual data collection area. Based on the pretest, some modifications were  
22 made to the questionnaires. Two days of training was given for data collectors and supervisors by the  
23 principal investigator on data collection tools, data collection techniques, approach to the interviews,  
24 and maintaining the privacy and confidentiality of the respondents. Every day after data collection,  
25 the questionnaires were reviewed and checked for completeness by the supervisors and the principal  
26 investigator.  
27  
28  
29  
30  
31

32  
33 Data was collected by six diploma Clinical Nurse using pretested and semistructured  
34 questionnaires through a house-to-house visit of mothers who have a children aged 0-23 months.  
35 Two BSc nurses were recruited as supervisors during data collection. If the eligible mother was  
36 absent from the home at the time of data collection, a revisit was done three times, and the mother  
37 who was absent at the third visit was considered as non-respondent.  
38  
39  
40  
41

## 42 43 **2.7 Patient and public involvement**

44  
45 No patient involved in this study.  
46  
47

## 48 49 **2.8 Operational definition**

- 50  
51 • **Utilization:** participation of a child for GMP services at least once for 0 month, at least two times  
52 for 1±3 months, at least five times for 4±11 months and at least four times per year for 12±23  
53 months. In addition, it should be plotted or recorded on the child growth chart.[18], [23].  
54  
55  
56  
57  
58  
59  
60



- **Family health card utilization:** the mother is considered as utilized of family health card, if she had the cards at home, plotted and able to interpret information displayed on weight for age child growth chart during every GMP sessions.
- **Early Postnatal care:** is the care given to the women and her new-borns at least once from the second days through seventh days after delivery [24]

## 2.9 Data processing and analysis

All data were checked visually, coded, and entered into Epi-data version 4.6.0 and exported into SPSS version 25 software packages for analysis. Descriptive statistics (frequency and cross tabulation) were calculated for variables. The results were presented in the form of tables and text using frequencies and summary statistics such as mean, standard deviation, and percentage to describe the study population with relevant variables.

Before performing Principal Component Analysis (PCA) for variables explaining household wealth index, all the necessary assumptions and prerequisites were checked. The degree of association between independent and dependent variables were assessed using odds ratio with 95% confidence interval. Simple binary logistic regression analysis was performed to select candidate variables for multivariable regression analysis. Variables with  $p$ -value $<0.25$  were taken as cut-off point to select eligible variables for the multivariable regression analysis and  $p$ -value $<0.05$  was declared as statistically significant in the final model.

Pseudo regression was performed to check multi-collinearity between independent variables, the minimum tolerance and maximum variance inflation factor (VIF) was found to be 0.80 and 1.89 respectively. For the finally fitted multivariable logistic regression model, the adequacy of the model to predict the outcome variables was checked to predict the outcome variables was checked by Hosmer-Lemeshow goodness-of-fit and  $p$ -value $>0.05$ .

## 3. RESULT

### 3.1. Socio-demographic and economic characteristics of households.

In this study total of 372 mother-child pairs were included yielding a response rate of 95.2%. The mean age (month) of the children was  $11.25\pm 6.433SD$  and more than half the children 187(52.8%) belongs to the age category below 11 months. Regarding the age of respond, majority of them were in the age category below 30years. The mean age (year) of the mothers was  $24.91\pm 3.472SD$ . More

than half of the respondents 181(58.1%), were attended secondary and above education . Nearly half 160(45.3%) of the respondents were housewives. In-terms of wealth status of, 116(32.8%) and 93(26.2%) ranked under higher and lower tertiles wealth status respectively. (Table 2)

**Table 2: Demographic and socio-economic characteristics of mothers with children aged 0-23 months, Mettu town, 2021. (n=354)**

| Variable               | Categories          | Frequency | Percentage |
|------------------------|---------------------|-----------|------------|
| Sex of the child       | Male                | 184       | 51.6       |
|                        | Female              | 171       | 48.4       |
| Age of a child/months  | 0-11                | 187       | 52.8       |
|                        | 12-23               | 167       | 47.2       |
| Maternal Age           | <30                 | 329       | 92.9       |
|                        | ≥30                 | 25        | 7.1        |
| Religion of mother     | Orthodox            | 136       | 38.5       |
|                        | Muslim              | 111       | 31.4       |
|                        | Protestant          | 96        | 27         |
|                        | Others*             | 11        | 3.1        |
| Ethnicity of Mother    | Oromo               | 289       | 81.7       |
|                        | Amhara              | 36        | 10.1       |
|                        | Gurage              | 14        | 4.00       |
|                        | Others**            | 15        | 4.20       |
|                        | No formal education | 32        | 9.0        |
| Level of education     | Primary             | 141       | 39.8       |
|                        | Secondary and above | 181       | 51.2       |
|                        | House wife          | 160       | 45.3       |
| Occupational status    | Merchant            | 36        | 10.2       |
|                        | Government employee | 53        | 14.9       |
|                        | Private employee    | 48        | 13.7       |
|                        | Student             | 39        | 10.9       |
|                        | Others***           | 18        | 4.97       |
| Current marital status | Married             | 321       | 90.7       |
|                        | Single              | 20        | 5.6        |
|                        | Divorced            | 11        | 3.1        |
|                        | Widowed             | 2         | 0.6        |
| Family size            | <3                  | 96        | 27.2       |
|                        | 4-5                 | 165       | 46.5       |
|                        | >5                  | 93        | 26.3       |

|               |                |     |      |
|---------------|----------------|-----|------|
| Wealth status | Lower tertile  | 93  | 26.2 |
|               | Middle tertile | 145 | 41.0 |
|               | Higher tertile | 116 | 32.8 |

\*Catholic, Wakefata, &Jiohava \*\*Kambata, Hadiya, Tigre, Agnuak&Nuer \*\*\*Daily labourer

### 3.2. Information on availability of health facility with specific health services

In this study, nearly half 168(47.5%) of the study participants takes thirty minute and below to reach the nearest health facility. More than two-thirds 272(76.7%) of respondents prefer to go health centres for their child's care. Regarding perceived awareness of the respondents on the availability of GMP services, half of 187 (52.8%) of the respondents were aware of the availability of GMP services at health facility (**Table 3**).

**Table 3: Information on availability and accessibility of health services among mother-child pair, Mettu town, 2021. (n=354)**

| Variable                                                        | Category       | Frequency | Percentage |      |
|-----------------------------------------------------------------|----------------|-----------|------------|------|
| Time it takes to the nearest health facility                    | ≤30minutes     | 168       | 47.5       |      |
|                                                                 | >30minutes     | 186       | 52.5       |      |
| The most frequently visited health facility for child care.     | Health centre  | 272       | 76.7       |      |
|                                                                 | Health post    | 9         | 2.5        |      |
|                                                                 | Private clinic | 51        | 14.3       |      |
|                                                                 | Hospital       | 23        | 6.5        |      |
| Perceived awareness on availability of specific health Services | ANC            | Yes       | 318        | 89.8 |
|                                                                 |                | No        | 36         | 10.2 |
|                                                                 | Delivery       | Yes       | 301        | 85.1 |
|                                                                 |                | No        | 53         | 14.9 |
|                                                                 | PNC            | Yes       | 242        | 68.3 |
|                                                                 |                | No        | 112        | 31.7 |
| GMP                                                             | Yes            | 187       | 52.8       |      |
|                                                                 | No             | 167       | 47.2       |      |

### 3.3. Information on utilization of maternal and child health service

Among 354 mothers participated in this study, more than half 181(55.5%) the mothers had ANC follow-up with frequency of visits four and more. Majority of the mothers 334(94.4%) delivered at health institution but, only one third 123(34.8%) of the mothers had an early PNC. **(Table 4)**

**Table 4: Variables used to assess the information on MCH service among mothers and their children, Mettu, Ethiopia, 2021 (n=354)**

| Variable                        | Category                | Frequency | Percentage |
|---------------------------------|-------------------------|-----------|------------|
| ANC follow-up                   | No                      | 25        | 7.1        |
|                                 | Yes                     | 329       | 92.9       |
| Frequency of ANC follow-up      | <4 visits               | 147       | 44.8       |
|                                 | ≥ 4 visits              | 181       | 55.5       |
| Place of delivery               | Home                    | 20        | 5.6        |
|                                 | Health institution      | 334       | 94.4       |
| Early-PNC                       | No                      | 231       | 65.2       |
|                                 | Yes                     | 123       | 34.8       |
| Vaccination status of the child | Not vaccinated          | 9         | 2.5        |
|                                 | Vaccinating             | 137       | 38.8       |
|                                 | Defaulter               | 6         | 1.6        |
|                                 | Fully vaccinated        | 202       | 57.1       |
| Reason for not vaccinated       | Distance to EPI sites   | 1         | 12.5       |
|                                 | Do not know the benefit | 8         | 87.5       |

### 3.4. Reasons for frequent health facility visits by Mothers

The finding of this study revealed that, nearly two-thirds 209(59.0%) of the mothers frequently visits health facility to have their child's vaccinated, only 15(4.3%) of the mothers who participated in the study took their children for weighing or GMP service. **(Figure 3)**

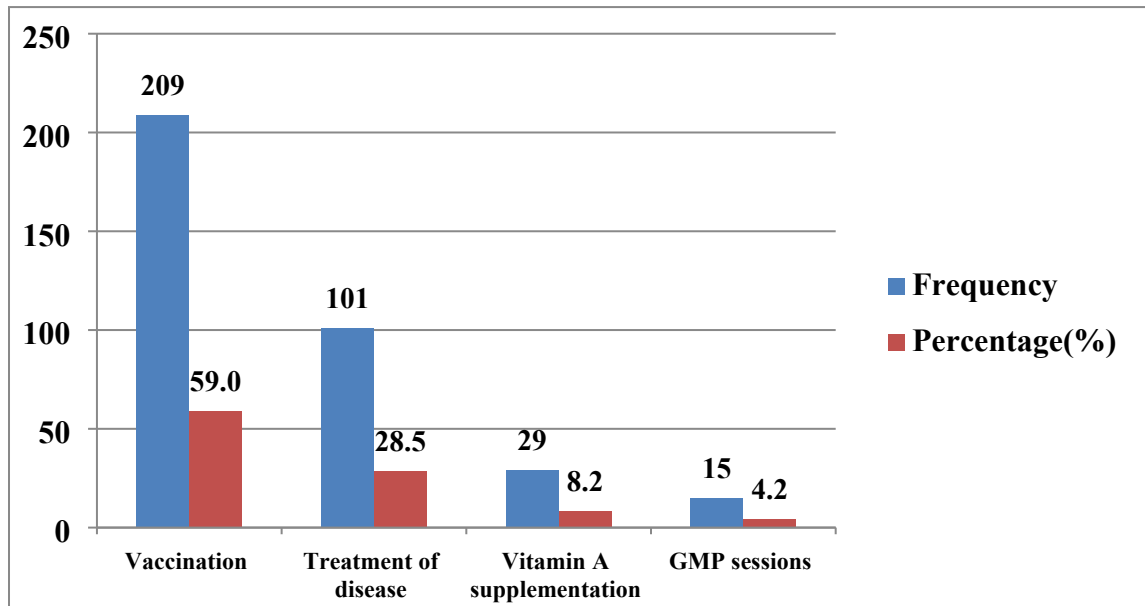

**Figure 1: Mothers most common reason to visit health facility, Mettu town, 2021. (n=354)**

### 3.5. Child feeding and growth monitoring knowledge of Mothers

The finding of this study reported that, majority of the respondents 310(87.6%) were counselled on child feeding. Almost all respondents 347(98.1%) were provided breast milk to their babies immediately after birth. Nearly half 166(46.9%) of the study participants were utilizing family health cards and the majority 153(92.05%) of those utilized mothers were able to read and interpret information displayed on the growth chart. (Table 5)

**Table 5: Child feeding and growth chart knowledge of mothers, Mettu town, 2021. (n=354)**

| Variable                                       | Category         | Frequency | Percentage |
|------------------------------------------------|------------------|-----------|------------|
| Counselled by HCWs on child feeding            | No               | 44        | 12.4       |
|                                                | Yes              | 310       | 87.6       |
| The first thing given after birth              | Breast milk      | 347       | 98.1       |
|                                                | Other*           | 7         | 1.86       |
| Time for BF initiation immediately after birth | Within 1hr       | 342       | 96.7       |
|                                                | Greater than 1hr | 11        | 3.1        |
| Duration of EBF                                | 3 months         | 7         | 1.9        |
|                                                | 6 months         | 344       | 97.2       |
|                                                | 1 year           | 3         | 0.9        |
| Total duration of BF                           | Below 2year      | 33        | 9.33       |

|                                                    |                                    |     |       |
|----------------------------------------------------|------------------------------------|-----|-------|
|                                                    | 2year and greater                  | 321 | 90.68 |
| Do utilize family health card at home.             | No                                 | 188 | 53.1  |
|                                                    | Yes                                | 166 | 46.9  |
| Can you read information displayed on growth chart | No                                 | 13  | 7.95  |
|                                                    | Yes                                | 153 | 92.05 |
| Who thought you                                    | HCWs                               | 99  | 64.95 |
|                                                    | By my self                         | 46  | 30.01 |
|                                                    | HEWs                               | 8   | 5.04  |
| What does it mean if growth curve flattens         | Child not growing well             | 72  | 46.8  |
|                                                    | Child may be sick                  | 31  | 20.3  |
|                                                    | Child not eating well              | 50  | 32.9  |
| What does it mean if growth curve rising           | Child gaining weight               | 89  | 58.4  |
|                                                    | Child is healthy                   | 16  | 10.6  |
|                                                    | Child is eating well               | 48  | 31.0  |
| What does it mean, if growth curve is falling      | Child is not gaining weight        | 66  | 43.2  |
|                                                    | Child may be sick or has been sick | 36  | 23.4  |
|                                                    | Child is not eating well           | 51  | 33.4  |

Other\* Formula milk, water, cow milk

### 3.6. Utilization of GMP services

This study revealed that, one-fourth 89(25.2%) of the mothers were utilized GMP service with [95% CI 24.1-33.0]. From those respondents participated in this study, nearly two-thirds 196 (60.9%) knows the benefit of GMP. Half 108(50.5%) of the respondents reported as, “to monitor the child’s growth” when asked for the benefit of GMP sessions. More than two-thirds 59(66.7%) of the respondents followed GMP sessions at health centre (**Table 6**)

**Table 6: Variables to assess utilization of GMP, Mettu town, 2021. (n=354)**

| Variable               | Category     | Frequency | Percentage |
|------------------------|--------------|-----------|------------|
| GMP utilization status | Utilized     | 89        | 25.2       |
|                        | Not utilized | 265       | 74.8       |

|                                                       |                       |     |       |
|-------------------------------------------------------|-----------------------|-----|-------|
| Know benefit of regular GMP session                   | Yes                   | 216 | 60.9  |
|                                                       | No                    | 138 | 29.1  |
| Benefit of regularly taking the child for GMP session | To monitor growth     | 108 | 50.0  |
|                                                       | To seek medical care  | 7   | 3.06  |
|                                                       | To know health status | 101 | 46.94 |
| Place where GMP given                                 | Health centre         | 59  | 66.7  |
|                                                       | EPI outreach sites    | 8   | 8.45  |
|                                                       | Health posts          | 22  | 24.85 |
| Who provides the service                              | HEWs                  | 30  | 33.15 |
|                                                       | HCWs                  | 59  | 66.8  |

### 3.6.1 Reasons for not taking the child for GMP session

This study reported that, more than one-thirds 135(38.2%) of the respondents who missed to take the child for GMP sessions didn't know the benefits of the GMP services and 102(28.9%) of the mothers lack the information about the services. **(Figure 4)**

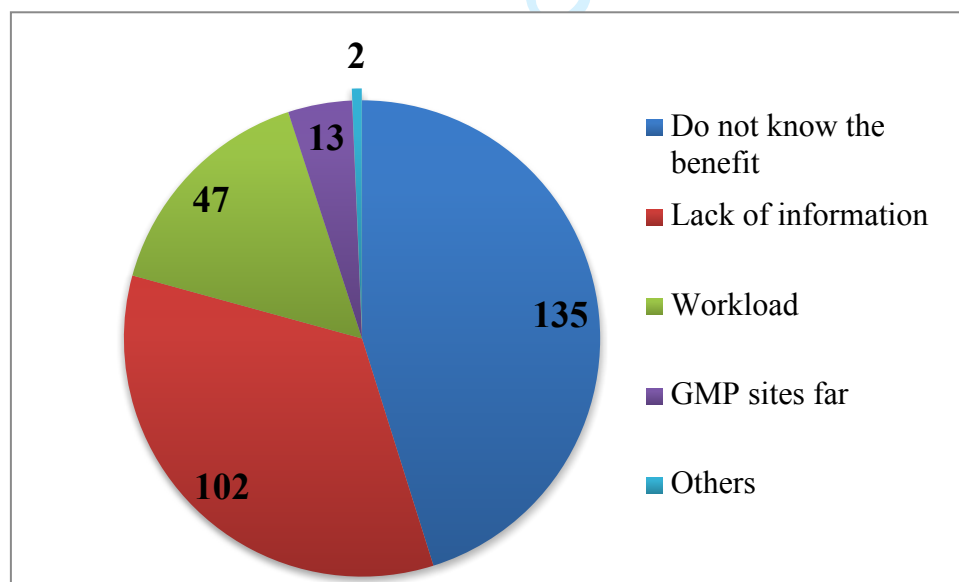

**Figure 2: Reasons for not regularly taking the child for GMP session, Mettu town, 2021. (n=354)**

### 3.7. Factors associated with GMP service utilization

On multivariable logistic regression analysis, mothers with children aged 0-11 months old [AOR=1.58; (95% CI:(1.052, 3.713)], Mothers who had early-PNC [AOR=1.72; (95% CI :( 1.657, 6.467)], mothers from households with middle and [AOR=0.108; (95% CI 0.047-0.319)] and lower tertile [AOR=0.073; (95% CI (0.013-0.874)], mothers utilizing family health card at home [AOR=2.09; (95% CI; 1.384, 5.343)]. Mothers who took thirty minutes and below to reach the nearest health facility [AOR=2.24; (95%CI: 2.061, 7.350)] were factors significantly associated with utilization of GMP (Table 7)

**Table 7: Bi-variable and multi-variable logistic regression analysis of GMP utilization among mothers of children aged 0-23months in Mettu town, 2021. (n=354)**

| Variable                    | Category            | Utilization of GMP |            | 95% CI             |                             |
|-----------------------------|---------------------|--------------------|------------|--------------------|-----------------------------|
|                             |                     | Yes(%)             | No(%)      | COR                | AOR                         |
| Age of index child          | 12-23months         | 32(9.01)           | 135(38.2)  | 1                  | 1                           |
|                             | ≤11months           | 57(16.15)          | 130(36.6)  | 1.87(1.112-3.143)  | <b>1.58(1.052-3.713)**</b>  |
| Frequency of ANC visit      | <4                  | 28(7.91)           | 107(30.22) | 1                  | 1                           |
|                             | ≥4                  | 61(17.23)          | 110(31.07) | 2.12(1.204-3.519)  | 1.16(0.579-2.305)           |
| Early-PNC                   | No                  | 46(13.04)          | 185(52.2)  | 1                  | 1                           |
|                             | Yes                 | 43(12.1)           | 80(22.7)   | 2.14(1.277-3.577)  | <b>1.72(1.657-6.467)**</b>  |
| Maternal level of education | No formal education | 6(1.60)            | 26(7.40)   | 1                  | 1                           |
|                             | Primary             | 27(7.51)           | 114(32.25) | 1.17(0.404-3.356)  | 0.645(0.179-2.320)          |
|                             | Secondary and above | 56(15.8)           | 125(35.4)  | 2.15(0.775-5.946)  | 0.319(0.088-1.160)          |
| Wealth status               | Higher tertile      | 62(17.5)           | 54(15.25)  | 1                  | 1                           |
|                             | Middle tertile      | 17(4.80)           | 128(36.16) | 0.116(0.016-0.311) | <b>0.108(0.047-0.319)**</b> |
|                             | Lower tertile       | 10(2.82)           | 83(23.45)  | 0.099(0.012-0.697) | <b>0.073(0.013-0.874)**</b> |
| Family health               | No                  | 33(9.31)           | 155(43.8)  | 1                  | 1                           |



|   |                  |             |           |            |                   |                            |
|---|------------------|-------------|-----------|------------|-------------------|----------------------------|
| 1 |                  |             |           |            |                   |                            |
| 2 |                  |             |           |            |                   |                            |
| 3 | card utilization | Yes         | 56(15.8)  | 110(31.1)  | 2.40(1.427-4.027) | <b>2.09(1.384-5.343)**</b> |
| 4 | Perceived        | No          | 27(7.76)  | 133(37.6)  | 1                 |                            |
| 5 | awareness on     | Yes         | 62(17.4)  | 132(37.3)  | 2.26(1.323-3.858) | 1.67(0.871-3.203)          |
| 6 | GMP availability |             |           |            |                   |                            |
| 7 | Time to reach    | >30minutes  | 31(8.76)  | 155(43.78) | 1                 |                            |
| 8 | nearby health    | ≤ 30minutes | 58(16.38) | 110(31.07) | 2.64(2.410-7.297) | <b>2.23(2.061-7.350)**</b> |
| 9 | facility         |             |           |            |                   |                            |

**Note:** \*\* denote statistically significant variables in multivariable logistic regression at *p-value* <0.05, COR: Crude Odds Ratio, AOR: Adjusted Odds Ratio

#### 4. DISCUSSION

GMP services are essential until the child's second birthday in order to have a healthy and well-nourished child and to break the intergenerational cycle of malnutrition. Hence, this study was aimed to assess utilization of growth monitoring and promotion services and associated factors among mothers of children aged 0-23 months old in Mettu town. The proportion of GMP service utilization in this study area was found to be 25.2% with [95% CI 24.1-33.0]. This finding is comparable with a study conducted in rural lower part of Ghana 28.5% and Northern Ethiopia 30.7%[20], [25].

The finding of this study is lower compared to a study conducted in Lawra district of Ghana 70% and Nyamira country of Kenya 53.3%[16], [26]. The inconsistency might be due to, differences in socio-economic characteristics among study population, study design and study period.

However, the finding of the current study was higher compared to a study done in Thika sub-city of Kenya 20%, Mareka district, southern Ethiopia, 16.9% and Butajira District, southern Ethiopia, 11%[17], [18], [27]. The possible justification for the discrepancy might be differences in study setting, socio-economic and demographic characteristic among study participants and study period.

The age of index child was found to be significantly associated with utilization of growth monitoring and promotion services. Mothers with index child below 11 months were more 1.5 times more likely to utilize GMP compared to mothers with index child aged 12-23 months old. The possible explanation might be, children below 11 months old are recommended to go for several doses of immunization. Thus, most mothers will continue to send them to weighing centres until completion of the immunization. However, as the child's age advances, attendance at GMP sessions decreases.

1  
2  
3 This finding is similar to a study conducted in rural Ghana, which discovered a negative correlation  
4 between child age and GMP utilization. [25]. In contrast to this finding, a study conducted in the  
5 southern districts of South Wollo and Mareka found that mothers with index children aged 12-24  
6 months were more likely to utilize GMP services than those aged 11 months or less.[18], [19]. The  
7 inconsistency might be due to the differences in study design and sampling technique employed.  
8  
9

10  
11  
12  
13 Mothers who had early-PNC were 1.7 times more likely to utilize growth monitoring and promotion  
14 services compared to those mothers who had no early-PNC. The possible reason might be mothers  
15 who had early-PNC have frequent contact with health care providers. As a result, they may have  
16 more opportunities to receive child growth and development counseling. There is no other relevant  
17 study with this finding.  
18  
19  
20

21  
22  
23 Utilization of family health card was another predictor of growth monitoring and promotion services  
24 in this study. Those mothers utilizing family health card were 2 times more likely to utilize growth  
25 monitoring and promotion services compared to those who are not. This might be due to the  
26 possibility of family health cards motivating mothers to get GMP. This finding congruent with a  
27 study done in Yilmana woreda of northern Ethiopia[20].  
28  
29  
30

31  
32  
33 Compared to those mothers from households with higher tertile wealth status, mothers from  
34 households with lower and middle tertile wealth status were 89% and 92% less likely to utilize GMP  
35 services respectively. The study done in Southern Ethiopia supports this finding[18].The possible  
36 explanation could be, people with lower household tertile might be busy to fulfil their day to day  
37 livelihood need.  
38  
39  
40

41  
42  
43 The time it takes to reach nearby health facility was found to be significantly associated with GMP  
44 service utilization. Those mothers who took less than 30 minutes to reach a nearby health facility  
45 were more 2 times likely to utilize GMP than those mothers who took more than 30 minutes to reach  
46 a nearby health facility. This finding was in line with the studies conducted in Yilmana Dedisa and  
47 Butajira district[17], [20]. This could be because mothers who live near a health facility can bring  
48 their child for GMP service quickly and return to work, even if they are busy at work.  
49  
50  
51  
52  
53  
54  
55  
56  
57  
58  
59  
60

#### 4.1. Strength and Limitation of the study

There are certain limitations to this research. First, since the data was collected by the verbal report of the participants, there might be a possibility of response bias. Second, the study did not assess the qualitative perspective of GMP utilization.

### 5. Conclusions and Recommendation

The study found that only one-fourth of mothers with children aged 0-23 months in Mettu town were utilizing GMP services. Ages of index child, early-PNC, utilizing family health card, wealth status, and time to reach nearby health facility were significantly associated with GMP service utilization. Hence, utilization of family health card and early-PNC should be encouraged both at institutional and community level.

#### Abbreviation

AOR: Adjusted Odds Ratio; COR: Crude Odds Ratio; CI: Confidence Interval, GMP: Growth Monitoring and Promotion, HEW: Health Extension Worker, ANC: Antenatal Care, PNC: Postnatal Care, NNP: National Nutrition Program.

#### Authors' contributions

YT; developed the research idea, design, analysis, and drafted the manuscript. AM, SHSH, and KB conceived the study, supervised the data collectors, interpret the result and reviewed the manuscript. All authors read and approved the final manuscript. YT is responsible for the overall content as guarantor.

#### Data Availability

The data sets analyzed during the current study are available from the corresponding author on reasonable request.

#### Acknowledgment

We would like to acknowledge Mettu University, department of Public Health, and Mettu town health office for their support throughout the study period. We are also grateful to thank data collectors, supervisors, and study participants for their valuable contributions.

#### Funding

The authors did not get any funding for his study, and it was entirely supported by the authors.

## Ethical Approval and Consent to Participate

Ethical clearance was obtained from the ethical review board of Mettu University, College of Health Science (Ref.No.RPG 42/20) submitted to Mettu town health office. The letter of permission was obtained from Mettu town health office. Before beginning the data collection, written consent was obtained from the study participants, after clear information was provided about the objectives of the study. The study was conducted in accordance with the Helsinki Declaration.

## Conflict of Interest

The authors declare that they have no competing interests regarding the publication of this article.

## REFERENCES

- [1] P. Garner, R. Panpanich, and S. Logan, "Is routine growth monitoring effective? A systematic review of trials... including commentary by Davies DP.," *Arch. Dis. Child.*, vol. 82, no. 3, pp. 197–201, 2000, [Online]. Available: <http://www.epistemonikos.org/documents/e2b62e1929a334513c1b4fd795155729f2284025>.
- [2] A. Ashworth, R. Shrimpton, and K. Jamil, "Growth monitoring and promotion: Review of evidence of impact," *Matern. Child Nutr.*, vol. 4, no. SUPPL.1, pp. 86–117, 2008, doi: 10.1111/j.1740-8709.2007.00125.x.
- [3] M. Griffiths and J. Del Rosso, "GROWTH MONITORING AND THE PROMOTION OF HEALTHY YOUNG CHILD GROWTH: Evidence of Effectiveness and Potential to Prevent Malnutrition," *Matern. Child Nutr.*, no. November, pp. 86–117, 2008.
- [4] UNICEF, "Experts' consultation on growth monitoring and promotion strategies : Program guidance for a way forward Recommendations from a Technical Consultation UNICEF Headquarters New York , USA," pp. 1–8, 2008.
- [5] N. Mangasaryan, M. Arabi, and W. Schultink, "Revisiting the concept of growth monitoring and its possible role in community-based nutrition programs," *Food Nutr. Bull.*, vol. 32, no. 1, pp. 42–53, 2011, doi: 10.1177/156482651103200105.
- [6] C. Lu, M. M. Black, and L. M. Richter, "Risk of poor development in young children in low-income and middle-income countries: an estimation and analysis at the global, regional, and country level," *Lancet Glob. Heal.*, vol. 4, no. 12, pp. e916–e922, 2016, doi: 10.1016/S2214-109X(16)30266-2.
- [7] UNICEF, *Tracking Progress on Child and Maternal Nutrition*. 2009.
- [8] Unicef, World Health Organization, and T. W. Bank, "Levels and Trends in Child malnutrition. Key findings of the 2018 edition," *Midwifery*, pp. 1–6, 2018.

- 1  
2  
3 [9] U. Who and W. Bank, “Levels and trends in child malnutrition,” 2019.  
4  
5 [10] M. Demographic, H. Survey, and K. Indicators, *Mini Demographic and Health Survey*. 2019.  
6  
7 [11] arican development bank and agance frace development Wfp, “The Cost of hunger in Africa:  
8 Ethiopia WFP,” 2014.  
9  
10 [12] T. H. E. Foundation and F. O. R. Development, “INVESTING IN NUTRITION,” 2015.  
11  
12 [13] N. P. Planning, F. Health, and A. P. Managers, “Nutrition Program Planning and Supervision :  
13 For Health and Agriculture Program Managers Reference Manual July 2013 Nutrition  
14 Program Planning and Supervision : For Health and Agriculture Program Managers Reference  
15 Manual,” no. July, 2013.  
16  
17 [14] A. Yeshaneh, T. Fentahun, T. Belachew, A. Mohammed, and D. Adane, “Utilization of  
18 growth monitoring and promotion services and associated factors among children aged 0-23  
19 months in Banja District, Northwest Ethiopia 2020: A crosssectional study,” *PLoS One*, vol.  
20 16, no. 11 November 2021, pp. 1–14, 2021, doi: 10.1371/journal.pone.0259968.  
21  
22 [15] S. M. Bilal, A. Moser, R. Blanco, M. Spigt, and G. J. Dinant, “Practices and challenges of  
23 growth monitoring and promotion in Ethiopia: A qualitative study,” *J. Heal. Popul. Nutr.*, vol.  
24 32, no. 3, pp. 441–451, 2014.  
25  
26 [16] D. Tuobom Debuo, “Caregivers Knowledge, Attitude and Practices on Child Growth  
27 Monitoring and Promotion Activities in Lawra District, Upper West Region of Ghana,” *Sci. J.*  
28 *Public Heal.*, vol. 5, no. 1, p. 20, 2017, doi: 10.11648/j.sjph.20170501.13.  
29  
30 [17] L. Desalegne, S. Shiferaw, D. Haile, and T. Submitted, “Assessment of Knowledge and  
31 Utilization of Growth Monitoring and Promotion for under two children in Butajira, Ethiopia  
32 2017,” no. June, 2017.  
33  
34 [18] F. W. Feleke, A. A. Adole, and A. M. Bezabih, “Utilization of growth monitoring and  
35 promotion services and associated factors among under two years of age children in Southern  
36 Ethiopia,” *PLoS One*, vol. 12, no. 5, pp. 1–9, 2017, doi: 10.1371/journal.pone.0177502.  
37  
38 [19] S. Dagne, “Determinants of Growth Monitoring and Promotion Service Utilization Among  
39 Children 0-23 Months of Age in Northern Ethiopia : Unmatched Case Control Study,” *Res.*  
40 *Sq.*, vol. 1, pp. 15–20, 2020.  
41  
42 [20] S. Yeniew, “Utilization of Growth Monitoring and Promotion Service By Mothers of Children  
43 0-23 Months Old in Yilmana Denisa Woreda ,” 2020.  
44  
45 [21] S. Dagne, J. Aliyu, Y. Member, Y. Wassihun, P. Petrucka, and N. Fentahun, “Determinants of  
46 growth monitoring and promotion service utilization among children 0–23 months of age in  
47 northern Ethiopia: unmatched case-control study,” *BMC Nutr.*, vol. 7, no. 1, 2021, doi:  
48  
49  
50  
51  
52  
53  
54  
55  
56  
57  
58  
59  
60

- 1  
2  
3 10.1186/s40795-021-00470-y.  
4  
5 [22] M. Tekle, B. Tariku, A. Alagaw, E. Zerihun, and H. W. Bekele, “Exploring Reasons for Low  
6 Attendance of Mothers to Growth Monitoring and Promotion Program at Loka Abaya District,  
7 Southern Ethiopia: Exploratory Qualitative Study,” *J. Nutr. Metab.*, vol. 2019, pp. 6–7, 2019,  
8 doi: 10.1155/2019/3510649.  
9  
10  
11 [23] M. Faber, M. A. S. Phungula, J. D. Kvalsvig, and A. J. S. Benadé, “Acceptability of  
12 community-based growth monitoring in a rural village in South Africa,” *Food Nutr. Bull.*, vol.  
13 24, no. 4, pp. 350–359, 2003, doi: 10.1177/156482650302400405.  
14  
15 [24] T. G. Gebrehiwot *et al.*, “Prevalence and associated factors of early postnatal care service use  
16 among mothers who had given birth within the last 12 months in Adigrat town, Tigray,  
17 northern Ethiopia, 2018,” *Int. J. Womens. Health*, vol. 12, pp. 869–879, 2020, doi:  
18 10.2147/IJWH.S266248.  
19  
20 [25] F. Seidu, “Utilisation of Growth Monitoring and Promotion is Highest Among Children Aged  
21 0-11 Months : A Survey Among Mother-Child Pairs From Rural.”  
22  
23 [26] Jane Ilusa Nyabuti(Kenyatta University, “Factors associated with the continuation of growth  
24 monitoring among children 10 to 59 months old,” vol. 1, pp. 5–6, 2015.  
25  
26 [27] K. Lucy Mwari, M. N. Keraka Professor, K. University, and K. A. Jemimah Simbauni, “Care  
27 Giver Deteminants Of Utilization Of Growth Monitoring Clinic Among Children Aged 12-59  
28 Months In Urban Kiambu County, Kenya,” *Int. J. Innov. Res. Adv. Stud.*, vol. 4, no. 6, pp.  
29 334–338, 2017.  
30  
31  
32  
33  
34  
35  
36  
37  
38  
39  
40  
41  
42  
43  
44  
45  
46  
47  
48  
49  
50  
51  
52  
53  
54  
55  
56  
57  
58  
59  
60

# BMJ Paediatrics Open

## Utilization of Growth Monitoring and Promotion Service and Associated Factors among Mothers of Children Aged 0-23 Months Old in Mettu Town, South West Ethiopia

|                               |                                                                                                                                                                                                                                                                        |
|-------------------------------|------------------------------------------------------------------------------------------------------------------------------------------------------------------------------------------------------------------------------------------------------------------------|
| Journal:                      | <i>BMJ Paediatrics Open</i>                                                                                                                                                                                                                                            |
| Manuscript ID                 | bmjpo-2022-001588.R1                                                                                                                                                                                                                                                   |
| Article Type:                 | Original research                                                                                                                                                                                                                                                      |
| Date Submitted by the Author: | 11-Aug-2022                                                                                                                                                                                                                                                            |
| Complete List of Authors:     | Tufa, Yohanis ; Mettu Health Science College, Department of Health Extension Service<br>Mitiku, Abeza; Mettu University, Public Health;<br>Shemsu, Shuayib ; Mittuniversitetet, Department of Public Health<br>Bidira, Kebebe; Mettu University, Department of Nursing |
| Keywords:                     | Adolescent Health, Growth, Obesity                                                                                                                                                                                                                                     |
|                               |                                                                                                                                                                                                                                                                        |

SCHOLARONE™  
Manuscripts



I, the Submitting Author has the right to grant and does grant on behalf of all authors of the Work (as defined in the below author licence), an exclusive licence and/or a non-exclusive licence for contributions from authors who are: i) UK Crown employees; ii) where BMJ has agreed a CC-BY licence shall apply, and/or iii) in accordance with the terms applicable for US Federal Government officers or employees acting as part of their official duties; on a worldwide, perpetual, irrevocable, royalty-free basis to BMJ Publishing Group Ltd ("BMJ") its licensees and where the relevant Journal is co-owned by BMJ to the co-owners of the Journal, to publish the Work in this journal and any other BMJ products and to exploit all rights, as set out in our [licence](#).

The Submitting Author accepts and understands that any supply made under these terms is made by BMJ to the Submitting Author unless you are acting as an employee on behalf of your employer or a postgraduate student of an affiliated institution which is paying any applicable article publishing charge ("APC") for Open Access articles. Where the Submitting Author wishes to make the Work available on an Open Access basis (and intends to pay the relevant APC), the terms of reuse of such Open Access shall be governed by a Creative Commons licence – details of these licences and which [Creative Commons](#) licence will apply to this Work are set out in our licence referred to above.

Other than as permitted in any relevant BMJ Author's Self Archiving Policies, I confirm this Work has not been accepted for publication elsewhere, is not being considered for publication elsewhere and does not duplicate material already published. I confirm all authors consent to publication of this Work and authorise the granting of this licence.



Original Research Article

## Utilization of Growth Monitoring and Promotion Service and Associated Factors among Mothers of Children Aged 0-23 Months Old in Mettu Town, South West Ethiopia

Yohannes Tufa<sup>1</sup>, Abeza Mitiku<sup>2</sup>, Shuayib Shemsu<sup>2</sup>, Kebebe Bidira<sup>3</sup>

<sup>1</sup> Department of Health Extension Service , Mettu Health Science College, Mettu, Ethiopia

<sup>2</sup> Department of Public Health, College of Health Science, Mettu University, Mettu, Ethiopia

<sup>3</sup> Department of Nursing , College of Health Science, Mettu University, Mettu, Ethiopia

Correspondence should be addressed to Abeza Mitiku ; [abzmtk@gmail.com](mailto:abzmtk@gmail.com)

### Abstract

**Background:** Growth monitoring and promotion (GMP) is a preventive activity comprised of growth monitoring (GM) that serves as the core activity in an integrated child health and nutrition program. In most developing nations, including Ethiopia, however, the use of growth monitoring and promotion services is insufficient. Hence, the purpose of this study was to evaluate the use of GMP services and associated characteristics among women with children aged 0–23 in Mettu, Southwest Ethiopia.

**Objective:** To assess utilization of growth monitoring and promotion service and associated factors among mothers with children aged 0-23 months old in Mettu town, South West Ethiopia, 2021.

**Method:** A community-based cross-sectional study was conducted among 354 randomly selected mothers with children aged 0–23 months old from June 25 to July 27, 2021 in Mettu town. Epi-data version 4.6.0 was used to enter data, which was then exported to SPSS version 25 for analysis. Simple binary and multivariable logistic regression were performed to identify factors associated with GMP utilization.

**Results:** A total of 354 study participants were included in the study yielding a response rate of 95.2%. The proportion of GMP utilization was 25.2% [95% CI: 20.24-29.33]. In multivariable regression analysis, Age of index child 0-11 months [AOR=1.58; (95% CI: 1.052, 3.713)], early-PNC [AOR=1.72; (95% CI=1.657, 6.467)], middle tertile wealth status [AOR=0.108; (95% CI 0.047-0.319)] and lower tertile wealth status [AOR=0.073; (95% CI (0.013-0.874)], utilization of family health card [AOR=2.09; (95% CI; 1.384, 5.343)] and taking ≤ 30 minutes to reach the nearest health facility [AOR=2.23; (95%CI: 2.061, 7.350)] were significantly associated with GMP service utilization.

**Conclusion and recommendation:** In this study, only one-fourth of mothers with children aged 0–23 months old were utilizing GMP services. GMP service utilization was found to be significantly associated with child age, early-PNC, wealth status, family health card, and time taking  $\leq 30$  minutes to reach the nearest health facility. Hence, appropriate strategies that promote and encourage GMP service utilization should be designed .

**Key words:** Growth Monitoring, Utilization, Mettu town, Children Aged 0-23Months

## 1. Introduction

Growth monitoring is defined as the regular measurement, plotting, and interpreting of a child's growth on a regular basis in order to respond when abnormal growth is noticed, with the aim of improving the child's nutritional status. Improved nutritional status, increased utilization of health care services, and subsequently a reduction in mortality are the main potential advantages of growth monitoring and promotion [1-2].

The majority of growth monitoring and promotion services are provided in health institutions or in communities. The main advantages of growth monitoring are that it helps families and community workers to identify children with growth failure early, when it is easier to intervene [3–5].

Child growth and development is one of the major public health problems in low and middle income countries[6]. Poor child growth is attributed to a greater childhood mortality as a result of severe infections and increased susceptibility to common childhood illnesses, which account for the majority of deaths among children under the age of five[7]. Malnutrition is directly or indirectly responsible for about half of all childhood deaths worldwide [8]. In 2019, there were 149 million children under the age of five in the world. Out of those, 49 million were stunted, 17 million were severely wasted, and 40 million were overweight [9].

In Ethiopia, Child malnutrition is a serious public health concern . According to the Ethiopian Mini Demographic and Health Survey of 2019, 37% of children under the age of five were stunted, 21% were underweight, and 7% were wasted. Similarly, in the Oromia region, 35.6% of children were stunted, 16.1% were underweight, and 4.7% were wasted[10]. In terms of the country's economic losses, the estimated annual costs of child malnutrition are 55.5 billion Ethiopian birr (ETB), or 16.5% of GDP[11].

The most cost-effective method for tracking the challenging public health problem of malnutrition is through various preventive techniques, including GMP. This includes ensuring that all children who

1  
2  
3 were normal weight at birth remain in that range, and that those who were low weight at birth are  
4 quickly brought into a healthy growth range[3].  
5  
6

7 It is critical to promote and improve a child's health during the window of opportunity, that last from  
8 conception to the child's second birthday[12]. Despite the fact that GMP is one of the activities that  
9 the Ethiopian government is currently focusing on to combat child malnutrition, only a few mothers  
10 brought their children for this service [13,14]. Studies done in different parts of Ethiopia revealed  
11 that only 16.9-38.9% proportion of mothers were attending GMP service [14–19]. Lack of  
12 appropriate information about GMP service, lack of support from husbands, distance from the health  
13 facility, pastoral life style and cultural issues such as the fear of “evil eye” were factors contributed  
14 for utilization of GMP service[17, 20].  
15  
16  
17  
18  
19  
20

21 The irregularity of the GMP session due to health extension work load, not recording the age and  
22 weight of the child accurately, the mother's wrong belief, and the skill gap of health extension  
23 workers were challenges of GMP utilization [17]. Since 2008, Ethiopia has adopted GMP as a  
24 nutrition-specific intervention, but utilization of growth monitoring and promotion services has been  
25 limited [13].  
26  
27  
28  
29

30 However, limited evidence is available on the level of utilization of the GMP services in Mettu town.  
31 Hence, this study is intended to find out how widely GMP services are being utilized and what  
32 factors have affected the program in Mettu town.  
33  
34  
35

## 36 **2. Materials and Methods**

### 37 **2.1. Study area and period**

38  
39  
40  
41  
42 The study was conducted in Mettu town from June 25 to July 27, 2021, which is located in I/A/Bor  
43 Zone, Oromia region, South West Ethiopia and is 542 km from Addis Ababa, the capital city of  
44 Ethiopia. Mettu is a market town with six administrative kebeles. One health center, one specialized  
45 hospital, and three health posts are found in the town. The total population of the town is estimated to  
46 be 49,538. The under five and under two age groups were estimated to be 8,139 and 2,828  
47 respectively.  
48  
49  
50  
51  
52

### 53 **2.2. Study design and Population**

54  
55  
56  
57 Community-based cross-sectional study was employed from June 25 to July 27/2021. All mothers  
58 who have children aged 0-23 months old and live in Mettu town were the source population ,whereas  
59  
60

mothers who have children aged 0-23 and selected by simple random sampling from the sampling frame were the study population and included in the study.

### 2.3 Eligibility Criteria

**Inclusion Criteria** : Mothers with children aged 0-23 months old who have lived in Mettu town for at least 6 months were included in the study.

**Exclusion Criteria** : Mothers who were unable to respond due to medical or psychiatric illness were excluded.

### 2.4. Sample size Determination

The minimum required sample size was calculated using a double population proportion formula using Epi Info™ version 7 by considering the assumptions, (80%) power of the study, 95% confidence level, 1:1 ratio and proportion of outcome for the variable, place of delivery (33.33% exposed and 10.33% non-exposed). After adding a 10% non- response rate the final sample size for the study was 372(table 1).

**Table 1: Sample size determination to assess the utilization of GMP among mothers of children aged 0-23 months old in Mettu town, South West Ethiopia 2021.**

| S/<br>N | Variable                                 | Assumptions |              |       |      |                             |                | Sample<br>size | Reference |
|---------|------------------------------------------|-------------|--------------|-------|------|-----------------------------|----------------|----------------|-----------|
|         |                                          | CI<br>(%)   | Power<br>(%) | Ratio | AOR  | Proportion<br>of<br>outcome |                |                |           |
|         |                                          |             |              |       |      | Exposed                     | Non<br>exposed |                |           |
| 1.      | Place of delivery                        | 95          | 80           | 1:1   | 3.0  | 33.33%                      | 10.33%         | 372            | [18]      |
| 2.      | Family health card                       | 95          | 80           | 1:1   | 5.09 | 57.86%                      | 11.14%         | 139            | [20]      |
| 3.      | Distance from near<br>by health facility | 95          | 80           | 1:1   | 4.53 | 33.90%                      | 8.0%           | 359            | [19]      |

### 2.5 Sampling techniques and procedures

All six urban kebeles were included in the study to achieve the desired sample size. Initially, a sampling frame containing a list of 2,828 containing mothers-child pairs aged 0-23 months old along with child's date of birth and house number was obtained from the respective health posts. Then samples representing each kebele were calculated using proportion to population size allocation.

1  
2  
3 Finally, a simple random sampling technique was employed using computer generated program  
4 (Microsoft-excel) to select a total of 372 samples from the six urban kebeles.  
5  
6

## 7 **2.6 Data collection procedures and tools**

8  
9  
10 Data were collected from mothers using a semi-structured interviewer administered questionnaire.  
11 The questionnaire was adapted from previous similar studies [17,20,22]. The questionnaire was first  
12 prepared in English and then translated to Afan Oromo and back to English to check the consistency  
13 by an expert who had good ability in both languages. The questionnaire was divided into five  
14 sections: socio-demographic and economic information; child and maternal health characteristics and  
15 mother-child feeding knowledge; maternal knowledge of the WHO growth chart and GMP service;  
16 and the availability and accessibility of health services.  
17  
18  
19  
20  
21  
22

23  
24 Data was collected by six Dipploma clinical nurses and two BSc nurses were recruited as  
25 supervisors during data collection. The younger child from the household was taken as an index  
26 child, and if twin children were found within one household, data was taken from one of them using  
27 the lottery method. If an eligible mother was absent during the data collection period, a revisit was  
28 done three times, and mothers absent on the third visit were considered non-respondent.  
29  
30  
31  
32

## 33 **2.7 Data quality control**

34  
35 Before data collection, the questionnaires were pretested on a 5% (20) sample size in another town,  
36 which was not part of the actual data collection area. Based on the pretest, some modifications, such  
37 as unclear or vague questions and wrong skip patterns, were corrected. Two days of training were  
38 given for data collectors and supervisors by the principal investigator on data collection tools, data  
39 collection techniques, approach to the interviews, and maintaining the privacy and confidentiality of  
40 the respondents. Every day after data collection, the questionnaires were reviewed and checked for  
41 completeness by the supervisors and the principal investigator..  
42  
43  
44  
45  
46  
47

## 48 **2.8 Patient and public involvement**

49  
50 No patient involved in this study.  
51  
52

## 53 **2.9 Operational definition**

- 54  
55 ✓ **GMP Utilization:** If mother participated in the GMP services at least once for 0 month old  
56 child, at least two times for 1-3 months old child, at least five times for 4-11 months and at  
57  
58  
59  
60

1  
2  
3 least four times per year for 12-23 months old child. In addition, it should be plotted or  
4 recorded on the child growth chart [18,23].

- 5  
6  
7 ✓ **Family health card utilization:** The mother is considered to have utilized the family health  
8 card if she had the cards at home, plotted and able to interpret information displayed on the  
9 weight for age child growth chart during every GMP session.
- 10  
11 ✓ **Early Postnatal care:** is the care given to the women and her new-borns at least once from  
12 the second days through seventh days after delivery [24]
- 13  
14 ✓ **Family health card:** is book which contains the weight for age child growth chart for both  
15 sexes and used to plot the growth pattern of the child attending GMP session and would to be  
16 held by the mother.
- 17  
18 ✓ **Wealth index:** it is measured using fixed household asset. Factor score was derived using  
19 PCA (Principal Component Analysis) then the composite score was ranked in to three tertiles  
20 [25]

## 26 27 **2.10 Data processing and analysis**

28  
29 All data were checked visually, coded, and entered into Epi-data version 4.6.0 and exported into  
30 SPSS version 25 software packages for analysis. Descriptive statistics (frequency and cross  
31 tabulation) were calculated for variables. The results were presented in the form of tables and text  
32 using frequencies and summary statistics such as mean, standard deviation, and percentage to  
33 describe the study population with relevant variables.

34  
35 Before performing Principal Component Analysis (PCA) for variables explaining the household  
36 wealth index, all the necessary assumptions and prerequisites were checked. The degree of  
37 association between independent and dependent variables was assessed using odds ratio with 95%  
38 confidence interval. A simple binary logistic regression analysis was performed to select candidate  
39 variables for multivariable regression analysis. Variables with  $p$ -value $<0.25$  were taken as cut-off  
40 point to select eligible variables for the multivariable regression analysis and  $p$ -value $<0.05$  was  
41 declared as statistically significant in the final model.

42  
43 Pseudo regression was performed to check multi-collinearity between independent variables. The  
44 minimum tolerance and maximum variance inflation factor (VIF) were found to be 0.80 and 1.89  
45 respectively. For the finally fitted multivariable logistic regression model, the adequacy of the model  
46 to predict the outcome variables was checked by Hosmer-Lemeshow goodness-of-fit and  $p$ -  
47 value $>0.05$ .

### 3. RESULT

#### 3.1. Socio-demographic and economic characteristics of households.

In this study, a total of 354 mother-child pairs were included, yielding a response rate of 95.2%. The mean age (month) of the children was 11.25(6.433) and more than half the children, 187(52.8%), belonged to the age category below 11 months. Regarding the age of respondents, the majority 329,(92.9%) of them were in the age category below 30. The mean age (year) of the mothers was 24.91(3.472). More than half of the respondents 181(51.2%) attended secondary and above education . Nearly half 160(45.3%) of the respondents were housewives. In-terms of wealth status , 116(32.8%) and 93(26.2%) ranked in the higher and lower tertiles, respectively (**Table 2**)

**Table 2:Demographic and socio-economic characteristics of mothers with children aged 0-23months, Mettu town, 2021. (n=354)**

| Variable              | Categories          | Frequency | Percentage |
|-----------------------|---------------------|-----------|------------|
| Sex of the child      | Male                | 184       | 51.98      |
|                       | Female              | 170       | 48.02      |
| Age of a child/months | 0-11                | 187       | 52.8       |
|                       | 12-23               | 167       | 47.2       |
| Maternal Age          | <30                 | 329       | 92.9       |
|                       | ≥30                 | 25        | 7.1        |
| Religion of mother    | Orthodox            | 136       | 38.5       |
|                       | Muslim              | 111       | 31.4       |
|                       | Protestant          | 96        | 27         |
|                       | Others*             | 11        | 3.1        |
| Ethnicity of Mother   | Oromo               | 289       | 81.7       |
|                       | Amhara              | 36        | 10.1       |
|                       | Gurage              | 14        | 4.00       |
|                       | Others**            | 15        | 4.20       |
|                       | No formal education | 32        | 9.0        |
| Level of education    | Primary             | 141       | 39.8       |
|                       | Secondary and above | 181       | 51.2       |
| Occupational status   | House wife          | 160       | 45.3       |
|                       | Merchant            | 36        | 10.2       |
|                       | Government employee | 53        | 14.9       |
|                       | Private employee    | 48        | 13.7       |
|                       | Student             | 39        | 10.9       |
|                       | Others***           | 18        | 4.97       |

|                        |                |     |      |
|------------------------|----------------|-----|------|
| Current marital status | Married        | 321 | 90.7 |
|                        | Single         | 20  | 5.6  |
|                        | Divorced       | 11  | 3.1  |
|                        | Widowed        | 2   | 0.6  |
| Family size            | <3             | 96  | 27.2 |
|                        | 4-5            | 165 | 46.5 |
|                        | >5             | 93  | 26.3 |
| Wealth status          | Lower tertile  | 93  | 26.2 |
|                        | Middle tertile | 145 | 41.0 |
|                        | Higher tertile | 116 | 32.8 |

\*Catholic, Wakefata, & Jiohava \*\*Kambata, Hadiya, Tigre, Agnuak & Nuer \*\*\*Daily labourer

### 3.2. Information on availability of health facility with specific health services

In this study, nearly half 168(47.5%) of the study participants took thirty minutes or less to reach the nearest health facility. More than two-thirds (272(76.7%) of respondents prefer to go to health centres for their children's care. Regarding the perceived awareness of the respondents to the availability of GMP services, half of 187 (52.8%) of the respondents were aware of the availability of GMP services at health facilities (**Table 3**).

**Table 3: Information on availability and accessibility of health services among mother-child pair, Mettu town, 2021. (n=354)**

| Variable                                                        | Category       | Frequency | Percentage |      |
|-----------------------------------------------------------------|----------------|-----------|------------|------|
| Time it takes to the nearest health facility                    | ≤30minutes     | 168       | 47.5       |      |
|                                                                 | >30minutes     | 186       | 52.5       |      |
| The most frequently visited health facility for child care.     | Health centre  | 272       | 76.7       |      |
|                                                                 | Health post    | 9         | 2.5        |      |
|                                                                 | Private clinic | 51        | 14.3       |      |
|                                                                 | Hospital       | 23        | 6.5        |      |
| Perceived awareness on availability of specific health Services | ANC            | Yes       | 318        | 89.8 |
|                                                                 |                | No        | 36         | 10.2 |
|                                                                 | Delivery       | Yes       | 301        | 85.1 |
|                                                                 |                | No        | 53         | 14.9 |
|                                                                 | PNC            | Yes       | 242        | 68.3 |
|                                                                 |                | No        | 112        | 31.7 |
|                                                                 | GMP            | Yes       | 187        | 52.8 |



No 167 47.2

### 3.3. Information on utilization of maternal and child health service

Among 354 mothers who participated in this study, more than half 181 (55.5%) the mothers had ANC follow-up with a frequency of visits of four or more. The majority of the mothers 334(94.4%) delivered at health institutions, but only one third 123(34.8%) of the mothers had an early PNC.

#### (Table 4)

**Table 4: Variables used to assess the information on MCH service among mothers and their children, Mettu, Ethiopia, 2021 (n=354)**

| Variable                        | Category                | Frequency | Percentage |
|---------------------------------|-------------------------|-----------|------------|
| ANC follow-up                   | No                      | 25        | 7.1        |
|                                 | Yes                     | 329       | 92.9       |
| Frequency of ANC follow-up      | <4 visits               | 147       | 44.8       |
|                                 | ≥ 4 visits              | 181       | 55.5       |
| Place of delivery               | Home                    | 20        | 5.6        |
|                                 | Health institution      | 334       | 94.4       |
| Early-PNC                       | No                      | 231       | 65.2       |
|                                 | Yes                     | 123       | 34.8       |
| Vaccination status of the child | Not vaccinated          | 9         | 2.5        |
|                                 | Vaccinating             | 137       | 38.8       |
|                                 | Defaulter               | 6         | 1.6        |
|                                 | Fully vaccinated        | 202       | 57.1       |
| Reason for not vaccinated       | Distance to EPI sites   | 1         | 12.5       |
|                                 | Do not know the benefit | 8         | 87.5       |

### 3.4. Reasons for frequent health facility visits by Mothers

This study revealed that nearly two-thirds 209( 59.0%) of the mothers frequently visit health facilities to have their children vaccinated, but only 15(4.3%) of the mothers who participated in the study took their children for weighing or GMP service. **(Figure 3)**

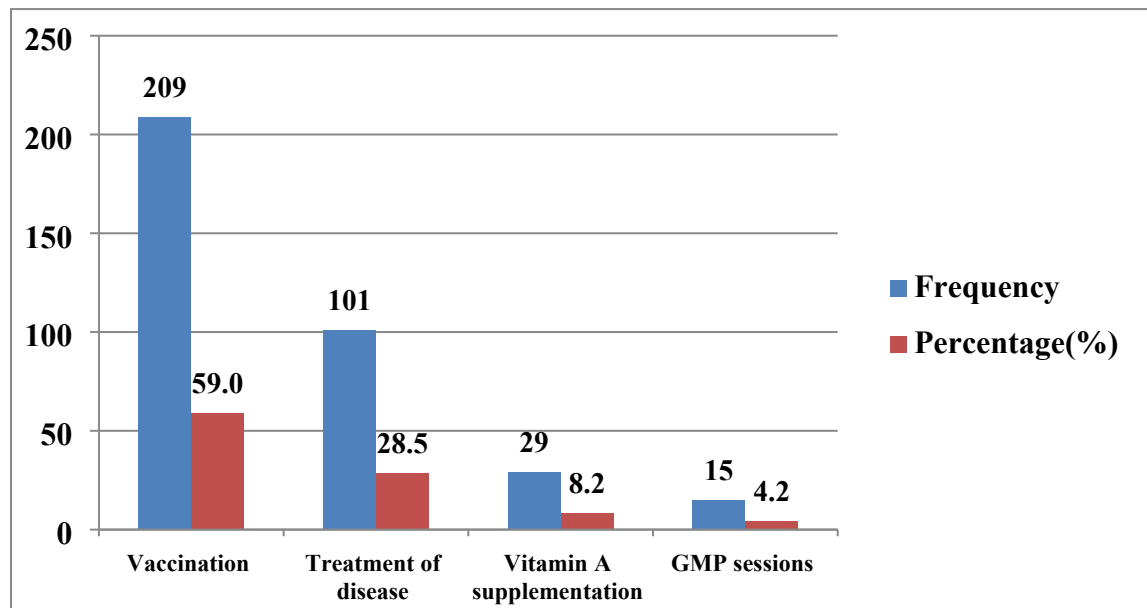

**Figure 1: Mothers most common reason to visit health facility, Mettu town, 2021. (n=354)**

### 3.5. Child feeding and growth monitoring knowledge of Mothers

The finding of this study reported that, majority of the respondents 310(87.6%) were counselled on child feeding. Almost all respondents 347(98.1%) were provided breast milk to their babies immediately after birth. Nearly half 166(46.9%) of the study participants were utilizing family health cards, and the majority (153(92.05%) of those utilizing mothers were able to read and interpret information displayed on the growth chart (Table 5)

**Table 5: Child feeding and growth chart knowledge of mothers, Mettu town, 2021. (n=354)**

| Variable                                       | Category         | Frequency | Percentage |
|------------------------------------------------|------------------|-----------|------------|
| Counselled by HCWs on child feeding            | No               | 44        | 12.4       |
|                                                | Yes              | 310       | 87.6       |
| The first thing given after birth              | Breast milk      | 347       | 98.1       |
|                                                | Other*           | 7         | 1.86       |
| Time for BF initiation immediately after birth | Within 1hr       | 342       | 96.7       |
|                                                | Greater than 1hr | 11        | 3.1        |
| Duration of EBF                                | 3 months         | 7         | 1.9        |
|                                                | 6 months         | 344       | 97.2       |
|                                                | 1 year           | 3         | 0.9        |
| Total duration of BF                           | Below 2year      | 33        | 9.33       |

|                                                    |                                    |     |       |
|----------------------------------------------------|------------------------------------|-----|-------|
|                                                    | 2year and greater                  | 321 | 90.68 |
| Do utilize family health card at home.             | No                                 | 188 | 53.1  |
|                                                    | Yes                                | 166 | 46.9  |
| Can you read information displayed on growth chart | No                                 | 13  | 7.95  |
|                                                    | Yes                                | 153 | 92.05 |
| Who thought you                                    | HCWs                               | 99  | 64.95 |
|                                                    | By my self                         | 46  | 30.01 |
|                                                    | HEWs                               | 8   | 5.04  |
| What does it mean if growth curve flattens         | Child not growing well             | 72  | 46.8  |
|                                                    | Child may be sick                  | 31  | 20.3  |
|                                                    | Child not eating well              | 50  | 32.9  |
| What does it mean if growth curve rising           | Child gaining weight               | 89  | 58.4  |
|                                                    | Child is healthy                   | 16  | 10.6  |
|                                                    | Child is eating well               | 48  | 31.0  |
| What does it mean, if growth curve is falling      | Child is not gaining weight        | 66  | 43.2  |
|                                                    | Child may be sick or has been sick | 36  | 23.4  |
|                                                    | Child is not eating well           | 51  | 33.4  |

Other\* Formula milk, water, cow milk

### 3.6. Utilization of GMP services

This study revealed that one-fourth of 89(25.2%) mothers utilized GMP service with [95% CI 20.24–29.33]. Of those respondents who participated in this study, nearly two-thirds 196 (60.9%) knew the benefit of GMP. Regarding the benefits of the GMP service, Half 108(50.5%) of the respondents reported the GMP service is used "to monitor the child's growth." More than two-thirds 59(66.7%) of the respondents followed GMP sessions at health centres.(Table 6)

**Table 6: Variables to assess utilization of GMP, Mettu town, 2021. (n=354)**

| Variable               | Category     | Frequency | Percentage |
|------------------------|--------------|-----------|------------|
| GMP utilization status | Utilized     | 89        | 25.2       |
|                        | Not utilized | 265       | 74.8       |

|                                                       |                       |     |       |
|-------------------------------------------------------|-----------------------|-----|-------|
| Know benefit of regular GMP session                   | Yes                   | 216 | 60.9  |
|                                                       | No                    | 138 | 29.1  |
| Benefit of regularly taking the child for GMP session | To monitor growth     | 108 | 50.0  |
|                                                       | To seek medical care  | 7   | 3.06  |
|                                                       | To know health status | 101 | 46.94 |
| Place where GMP given                                 | Health centre         | 59  | 66.7  |
|                                                       | EPI outreach sites    | 8   | 8.45  |
|                                                       | Health posts          | 22  | 24.85 |
| Who provides the service                              | HEWs                  | 30  | 33.15 |
|                                                       | HCWs                  | 59  | 66.8  |

### 3.6.1 Reasons for not taking the child for GMP session

This study reported that, more than one-thirds 135(38.2%) of the respondents who missed taking the child for GMP sessions didn't know the benefits of the GMP services, and 102(28.9%) of the mothers lacked information about the services. **(Figure 4)**

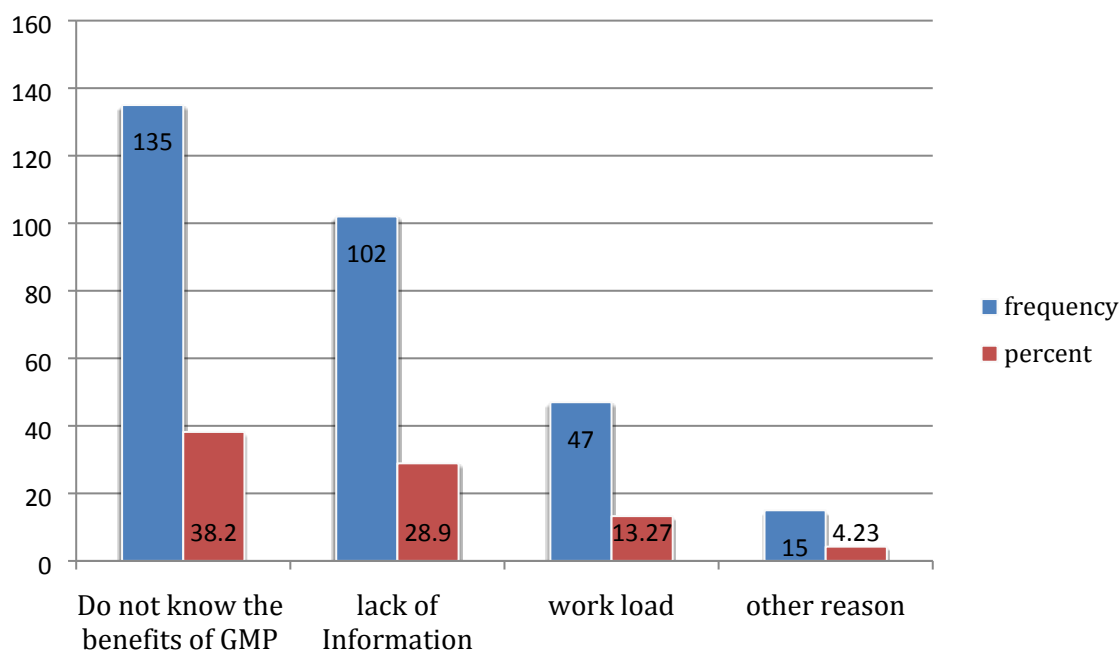

Figure 2: Reasons for not regularly taking the child for GMP session, Mettu town, 2021. (n=354)

### 3.7. Factors associated with GMP service utilization

On multivariable logistic regression analysis, mothers with children aged 0-11 months old [AOR=1.58; (95% CI:(1.052, 3.713)], Mothers who had early-PNC [AOR=1.72; (95% CI :( 1.657, 6.467)], mothers from households with middle and [AOR=0.108; (95% CI 0.047-0.319)] and lower tertile [AOR=0.073; (95% CI (0.013-0.874)], mothers utilizing family health card at home [AOR=2.09; (95% CI; 1.384, 5.343)]. Mothers who took thirty minutes and below to reach the nearest health facility [AOR=2.24; (95%CI: 2.061, 7.350)] were factors significantly associated with utilization of GMP (Table 7)

**Table 7: Bi-variable and multi-variable logistic regression analysis of GMP utilization among mothers of children aged 0-23months in Mettu town, 2021. (n=354)**

| Variable                       | Category            | Utilization of GMP |            | 95% CI             |                             |
|--------------------------------|---------------------|--------------------|------------|--------------------|-----------------------------|
|                                |                     | Yes(%)             | No(%)      | COR                | AOR                         |
| Age of index child             | 12-23months         | 32(9.01)           | 135(38.2)  | 1                  | 1                           |
|                                | ≤11months           | 57(16.15)          | 130(36.6)  | 1.87(1.112-3.143)  | <b>1.58(1.052-3.713)**</b>  |
| Frequency of ANC visit         | <4                  | 28(7.91)           | 107(30.22) | 1                  |                             |
|                                | ≥4                  | 61(17.23)          | 110(31.07) | 2.12(1.204-3.519)  | 1.16(0.579-2.305)           |
| Early-PNC                      | No                  | 46(13.04)          | 185(52.2)  | 1                  |                             |
|                                | Yes                 | 43(12.1)           | 80(22.7)   | 2.14(1.277-3.577)  | <b>1.72(1.657-6.467)**</b>  |
| Maternal level of education    | No formal education | 6(1.60)            | 26(7.40)   | 1                  |                             |
|                                | Primary             | 27(7.51)           | 114(32.25) | 1.17(0.404-3.356)  | 0.645(0.179-2.320)          |
|                                | Secondary and above | 56(15.8)           | 125(35.4)  | 2.15(0.775-5.946)  | 0.319(0.088-1.160)          |
| Wealth status                  | Higher tertile      | 62(17.5)           | 54(15.25)  | 1                  | 1                           |
|                                | Middle tertile      | 17(4.80)           | 128(36.16) | 0.116(0.016-0.311) | <b>0.108(0.047-0.319)**</b> |
|                                | Lower tertile       | 10(2.82)           | 83(23.45)  | 0.099(0.012-0.697) | <b>0.073(0.013-0.874)**</b> |
| Family health card utilization | No                  | 33(9.31)           | 155(43.8)  | 1                  |                             |
|                                | Yes                 | 56(15.8)           | 110(31.1)  | 2.40(1.427-4.027)  | <b>2.09(1.384-5.343)**</b>  |
| Perceived awareness on         | No                  | 27(7.76)           | 133(37.6)  | 1                  |                             |
|                                | Yes                 | 62(17.4)           | 132(37.3)  | 2.26(1.323-3.858)  | 1.67(0.871-3.203)           |

## GMP availability

|                        |             |           |            |                   |                            |
|------------------------|-------------|-----------|------------|-------------------|----------------------------|
| Time to reach          | >30minutes  | 31(8.76)  | 155(43.78) | 1                 |                            |
| nearby health facility | ≤ 30minutes | 58(16.38) | 110(31.07) | 2.64(2.410-7.297) | <b>2.23(2.061-7.350)**</b> |

**Note:** \*\* denote statistically significant variables in multivariable logistic regression at *p-value* <0.05, COR: Crude Odds Ratio, AOR: Adjusted Odds Ratio

#### 4. DISCUSSION

GMP services are essential until the child's second birthday in order to have a healthy and well-nourished child and to break the intergenerational cycle of malnutrition. Hence, this study was aimed to assess utilization of growth monitoring and promotion services and associated factors among mothers of children aged 0–23 months old in Mettu town. The proportion of GMP service utilization in this study area was found to be 25.2% with [95% CI: 20.24.-29.33]. This finding is comparable with a study conducted in rural lower part of Ghana 28.5% and Northern Ethiopia 30.7%[20,26].

The finding of this study is lower compared to a study conducted in Lawra district of Ghana 70% and Nyamira country of Kenya 53.3%[16, 27]. The inconsistency might be due to, differences in socio-economic characteristics among study population, study design and study period.

However, the finding of the current study was higher compared to a study done in Thika sub-city of Kenya 20%, Mareka district, southern Ethiopia, 16.9% and Butajira District, southern Ethiopia, 11%[17-18, 28]. The possible justification for the discrepancy might be differences in study setting, socio-economic and demographic characteristic among study participants and study period.

The age of the index child was found to be significantly associated with the utilization of growth monitoring and promotion services. Mothers with index children below 11 months were 1.5 times more likely to utilize GMP compared to mothers with index children aged 12–23 months old. The possible explanation might be that children below 11 months old are recommended to go for several doses of immunization. Thus, most mothers will continue to send them to weighing centers until completion of the immunization. However, as the child's age advances, attendance at GMP sessions decreases. This finding is similar to a study conducted in rural Ghana, which discovered a negative correlation between child age and GMP utilization [26]. In contrast to this finding, a study conducted in the Legambo districts of South Wollo zone and Mareka found that mothers with index children aged 12-24 months were more likely to utilize GMP services than those aged 11 months or less.[18-

1  
2  
3 19]. The inconsistency might be due to the differences in study design and sampling technique  
4 employed. The study conducted in Legambo district used an unmatched case-control study design,  
5 which may have contributed to this variation.  
6  
7  
8

9  
10 This study found that mothers who had early-PNC were 1.7 times more likely to utilize growth  
11 monitoring and promotion services compared to those mothers who had no early-PNC. This  
12 relationship between early PNC service and the higher utilization of GMP could be explained by the  
13 child nutrition and health counselling that provided as the part of PNC service. As a result, they  
14 could get more opportunities to receive child growth and development counseling. This study is  
15 supported by the study conducted in Benin that reported mothers who had early PNC were more  
16 likely to utilize maternal and child health services[29] .  
17  
18  
19  
20  
21

22  
23 Utilization of family health cards was another predictor of growth monitoring and promotion services  
24 in this study. Those mothers utilizing family health cards were 2 times more likely to utilize growth  
25 monitoring and promotion services compared to those who were not. This might be due to the  
26 possibility of family health cards motivating mothers to get GMP service. This finding congruent  
27 with a study done in Yilmana woreda of northern Ethiopia [20].  
28  
29  
30  
31

32  
33 Compared to those mothers from households with higher tertile wealth status, mothers from  
34 households with lower and middle tertile wealth status were 89% and 92% less likely to utilize GMP  
35 services respectively. The study done in Southern Ethiopia supports this finding[18]. The possible  
36 explanation could be that people with lower household tertile might be busy fulfilling their day-to-  
37 day livelihood needs and have limited time to attend the GMP service.  
38  
39  
40  
41

42  
43 The time it takes to reach a nearby health facility was found to be significantly associated with GMP  
44 service utilization. Those mothers who took less than 30 minutes to reach a nearby health facility  
45 were 2 times more likely to utilize GMP than those mothers who took more than 30 minutes to reach  
46 a nearby health facility. This finding was in line with the studies conducted in Yilmana Dedisa and  
47 Butajira district [17,20]. This could be because mothers who live near a health facility can bring their  
48 children for GMP service quickly and return to work, even if they are busy at work.  
49  
50  
51  
52  
53

#### 54 **4.1. Strength and Limitation of the study**

55  
56 There are certain limitations to this research. First, since the data was collected by the verbal report of the  
57 participants, there might be a possibility of response bias. To reduce response bias, the data collectors were  
58  
59  
60

1  
2  
3 trained on some techniques such as not judging the participants for their responses, asking neutrally and  
4 avoiding leading questions during the interview. Second, the study did not assess the qualitative  
5 perspective of GMP utilization.  
6  
7

## 8 **5. Conclusions and Recommendation**

10  
11 The study found that only one-fourth of mothers with children aged 0-23 months in Mettu town were  
12 utilizing GMP services. Ages of index child, early-PNC, utilizing family health card, wealth status,  
13 and time to reach nearby health facility were significantly associated with GMP service utilization.  
14 Hence, appropriate strategies that promote and encourage the GMP service utilization should be  
15 designed .  
16  
17  
18  
19

### 20 **Abbreviation**

21  
22 AOR: Adjusted Odds Ratio; COR: Crude Odds Ratio; CI: Confidence Interval, GMP: Growth  
23 Monitoring and Promotion , HEW: Health Extension Worker, ANC: Antenatal Care, PNC: Postnatal  
24 Care, NNP: National Nutrition Program.  
25  
26  
27

### 28 **Authors' contributions**

29  
30 YT; developed the research idea, design, analysis, and drafted the manuscript. AM, SHSH, and KB  
31 conceived the study, supervised the data collectors, interpret the result and reviewed the manuscript.  
32 All authors read and approved the final manuscript. YT is responsible for the overall content as  
33 guarantor.  
34  
35  
36

### 37 **Data Availability**

38  
39 The data sets analyzed during the current study are available from the corresponding author on  
40 reasonable request.  
41  
42

### 43 **Acknowledgment**

44  
45 We would like to acknowledge Mettu University, department of Public Health, and Mettu town  
46 health office for their support throughout the study period. We are also grateful to thank data  
47 collectors, supervisors, and study participants for their valuable contributions.  
48  
49

### 50 **Funding**

51  
52 The authors did not get any funding for his study, and it was entirely supported by the authors.  
53

### 54 **Ethical Approval and Consent to Participate**

55  
56 Ethical clearance was obtained from the ethical review board of Mettu University, College of Health  
57 Science (Ref.No.RPG 42/20) submitted to Mettu town health office. The letter of permission was  
58  
59  
60



obtained from Mettu town health office. Before beginning the data collection, written consent was obtained from the study participants, after clear information was provided about the objectives of the study. The study was conducted in accordance with the Helsinki Declaration.

### Conflict of Interest

The authors declare that they have no competing interests regarding the publication of this article.

### REFERENCES

- [1] P. Garner, R. Panpanich, and S. Logan, "Is routine growth monitoring effective? A systematic review of trials... including commentary by Davies DP.," *Arch. Dis. Child.*, vol. 82, no. 3, pp. 197–201, 2000, [Online]. Available: <http://www.epistemonikos.org/documents/e2b62e1929a334513c1b4fd795155729f2284025>.
- [2] A. Ashworth, R. Shrimpton, and K. Jamil, "Growth monitoring and promotion: Review of evidence of impact," *Matern. Child Nutr.*, vol. 4, no. SUPPL.1, pp. 86–117, 2008, doi: 10.1111/j.1740-8709.2007.00125.x.
- [3] M. Griffiths and J. Del Rosso, "GROWTH MONITORING AND THE PROMOTION OF HEALTHY YOUNG CHILD GROWTH: Evidence of Effectiveness and Potential to Prevent Malnutrition," *Matern. Child Nutr.*, no. November, pp. 86–117, 2008.
- [4] UNICEF, "Experts' consultation on growth monitoring and promotion strategies : Program guidance for a way forward Recommendations from a Technical Consultation UNICEF Headquarters New York , USA," pp. 1–8, 2008.
- [5] N. Mangasaryan, M. Arabi, and W. Schultink, "Revisiting the concept of growth monitoring and its possible role in community-based nutrition programs," *Food Nutr. Bull.*, vol. 32, no. 1, pp. 42–53, 2011, doi: 10.1177/156482651103200105.
- [6] C. Lu, M. M. Black, and L. M. Richter, "Risk of poor development in young children in low-income and middle-income countries: an estimation and analysis at the global, regional, and country level," *Lancet Glob. Heal.*, vol. 4, no. 12, pp. e916–e922, 2016, doi: 10.1016/S2214-109X(16)30266-2.
- [7] UNICEF, *Tracking Progress on Child and Maternal Nutrition*. 2009.
- [8] Unicef, World Health Organization, and T. W. Bank, "Levels and Trends in Child malnutrition. Key findings of the 2018 edition," *Midwifery*, pp. 1–6, 2018.
- [9] U. Who and W. Bank, "Levels and trends in child malnutrition," 2019.
- [10] M. Demographic, H. Survey, and K. Indicators, *Mini Demographic and Health Survey*. 2019.
- [11] arican development bank and agance frace development Wfp, "The Cost of hunger in Africa:

- Ethiopia WFP,” 2014.
- [12] T. H. E. Foundation and F. O. R. Development, “INVESTING IN NUTRITION,” 2015.
- [13] N. P. Planning, F. Health, and A. P. Managers, “Nutrition Program Planning and Supervision : For Health and Agriculture Program Managers Reference Manual July 2013 Nutrition Program Planning and Supervision : For Health and Agriculture Program Managers Reference Manual,” no. July, 2013.
- [14] A. Yeshaneh, T. Fentahun, T. Belachew, A. Mohammed, and D. Adane, “Utilization of growth monitoring and promotion services and associated factors among children aged 0-23 months in Banja District, Northwest Ethiopia 2020: A crosssectional study,” *PLoS One*, vol. 16, no. 11 November 2021, pp. 1–14, 2021, doi: 10.1371/journal.pone.0259968.
- [15] S. M. Bilal, A. Moser, R. Blanco, M. Spigt, and G. J. Dinant, “Practices and challenges of growth monitoring and promotion in Ethiopia: A qualitative study,” *J. Heal. Popul. Nutr.*, vol. 32, no. 3, pp. 441–451, 2014.
- [16] D. Tuobom Debuo, “Caregivers Knowledge, Attitude and Practices on Child Growth Monitoring and Promotion Activities in Lawra District, Upper West Region of Ghana,” *Sci. J. Public Heal.*, vol. 5, no. 1, p. 20, 2017, doi: 10.11648/j.sjph.20170501.13.
- [17] L. Desalegne, S. Shiferaw, D. Haile, and T. Submitted, “Assessment of Knowledge and Utilization of Growth Monitoring and Promotion for under two children in Butajira, Ethiopia 2017,” no. June, 2017.
- [18] F. W. Feleke, A. A. Adole, and A. M. Bezabih, “Utilization of growth monitoring and promotion services and associated factors among under two years of age children in Southern Ethiopia,” *PLoS One*, vol. 12, no. 5, pp. 1–9, 2017, doi: 10.1371/journal.pone.0177502.
- [19] S. Dagne, “Determinants of Growth Monitoring and Promotion Service Utilization Among Children 0-23 Months of Age in Northern Ethiopia : Unmatched Case Control Study,” *Res. Sq.*, vol. 1, pp. 15–20, 2020.
- [20] S. Yeniew, “Utilization of Growth Monitoring and Promotion Service By Mothers of Children 0-23 Months Old in Yilmana Denisa Woreda ,” 2020.
- [21] S. Dagne, J. Aliyu, Y. Member, Y. Wassihun, P. Petrucka, and N. Fentahun, “Determinants of growth monitoring and promotion service utilization among children 0–23 months of age in northern Ethiopia: unmatched case-control study,” *BMC Nutr.*, vol. 7, no. 1, 2021, doi: 10.1186/s40795-021-00470-y.
- [22] M. Tekle, B. Tariku, A. Alagaw, E. Zerihun, and H. W. Bekele, “Exploring Reasons for Low Attendance of Mothers to Growth Monitoring and Promotion Program at Loka Abaya District,

- 1  
2  
3 Southern Ethiopia: Exploratory Qualitative Study,” *J. Nutr. Metab.*, vol. 2019, pp. 6–7, 2019,  
4 doi: 10.1155/2019/3510649.  
5  
6  
7 [23] M. Faber, M. A. S. Phungula, J. D. Kvalsvig, and A. J. S. Benadé, “Acceptability of  
8 community-based growth monitoring in a rural village in South Africa,” *Food Nutr. Bull.*, vol.  
9 24, no. 4, pp. 350–359, 2003, doi: 10.1177/156482650302400405.  
10  
11 [24] T. G. Gebrehiwot *et al.*, “Prevalence and associated factors of early postnatal care service use  
12 among mothers who had given birth within the last 12 months in Adigrat town, Tigray,  
13 northern Ethiopia, 2018,” *Int. J. Womens. Health*, vol. 12, pp. 869–879, 2020, doi:  
14 10.2147/IJWH.S266248.  
15  
16 [25] EDHS, *FEDERAL DEMOCRATIC REPUBLIC OF ETHIOPIA Demographic and Health*  
17 *Survey*. 2016.  
18  
19 [26] F. Seidu, “Utilisation of Growth Monitoring and Promotion is Highest Among Children Aged  
20 0-11 Months : A Survey Among Mother-Child Pairs From Rural.”  
21  
22 [27] Jane Ilusa Nyabuti(Kenyatta University, “Factors associated with the continuation of growth  
23 monitoring among children 10 to 59 months old,” vol. 1, pp. 5–6, 2015.  
24  
25 [28] K. Lucy Mwari, M. N. Keraka Professor, K. University, and K. A. Jemimah Simbauni, “Care  
26 Giver Deteminants Of Utilization Of Growth Monitoring Clinic Among Children Aged 12-59  
27 Months In Urban Kiambu County, Kenya,” *Int. J. Innov. Res. Adv. Stud.*, vol. 4, no. 6, pp.  
28 334–338, 2017.  
29  
30 [29] E. Budu *et al.*, “Maternal healthcare utilization and full immunization coverage among 12–23  
31 months children in Benin: a cross sectional study using population-based data,” *Arch. Public*  
32 *Heal.*, vol. 79, no. 1, pp. 1–12, 2021, doi: 10.1186/s13690-021-00554-y.  
33  
34  
35  
36  
37  
38  
39  
40  
41  
42  
43  
44  
45  
46  
47  
48  
49  
50  
51  
52  
53  
54  
55  
56  
57  
58  
59  
60

# BMJ Paediatrics Open

## Utilization of Growth Monitoring and Promotion Service and Associated Factors among Mothers of Children Aged 0-23 Months Old in Mettu Town, South West Ethiopia

|                               |                                                                                                                                                                                                                                                                                    |
|-------------------------------|------------------------------------------------------------------------------------------------------------------------------------------------------------------------------------------------------------------------------------------------------------------------------------|
| Journal:                      | <i>BMJ Paediatrics Open</i>                                                                                                                                                                                                                                                        |
| Manuscript ID                 | bmjpo-2022-001588.R2                                                                                                                                                                                                                                                               |
| Article Type:                 | Original research                                                                                                                                                                                                                                                                  |
| Date Submitted by the Author: | 17-Aug-2022                                                                                                                                                                                                                                                                        |
| Complete List of Authors:     | Tufa, Yohanis ; Mettu Health Science College, Department of Health Extension Service<br>Mitiku, Abeza; Mettu University, Department of Public Health<br>Shemsu, Shuayib ; Mettu University, Department of Public Health<br>Bidira, Kebebe; Mettu University, Department of Nursing |
| Keywords:                     | Adolescent Health, Growth, Obesity                                                                                                                                                                                                                                                 |
|                               |                                                                                                                                                                                                                                                                                    |

SCHOLARONE™  
Manuscripts



I, the Submitting Author has the right to grant and does grant on behalf of all authors of the Work (as defined in the below author licence), an exclusive licence and/or a non-exclusive licence for contributions from authors who are: i) UK Crown employees; ii) where BMJ has agreed a CC-BY licence shall apply, and/or iii) in accordance with the terms applicable for US Federal Government officers or employees acting as part of their official duties; on a worldwide, perpetual, irrevocable, royalty-free basis to BMJ Publishing Group Ltd ("BMJ") its licensees and where the relevant Journal is co-owned by BMJ to the co-owners of the Journal, to publish the Work in this journal and any other BMJ products and to exploit all rights, as set out in our [licence](#).

The Submitting Author accepts and understands that any supply made under these terms is made by BMJ to the Submitting Author unless you are acting as an employee on behalf of your employer or a postgraduate student of an affiliated institution which is paying any applicable article publishing charge ("APC") for Open Access articles. Where the Submitting Author wishes to make the Work available on an Open Access basis (and intends to pay the relevant APC), the terms of reuse of such Open Access shall be governed by a Creative Commons licence – details of these licences and which [Creative Commons](#) licence will apply to this Work are set out in our licence referred to above.

Other than as permitted in any relevant BMJ Author's Self Archiving Policies, I confirm this Work has not been accepted for publication elsewhere, is not being considered for publication elsewhere and does not duplicate material already published. I confirm all authors consent to publication of this Work and authorise the granting of this licence.

Original Research Article

## Utilization of Growth Monitoring Service by Mothers of Infants in Mettu Town, South West Ethiopia

Yohannes Tufa<sup>1</sup>, Abeza Mitiku<sup>2</sup>, Shuayib Shemsu<sup>2</sup>, Kebebe Bidira<sup>3</sup>

<sup>1</sup> Department of Health Extension Service, Mettu Health Science College, Mettu, Ethiopia

<sup>2</sup> Department of Public Health, College of Health Science, Mettu University, Mettu, Ethiopia

<sup>3</sup> Department of Nursing, College of Health Science, Mettu University, Mettu, Ethiopia

Correspondence should be addressed to Abeza Mitiku ; [abzmtk@gmail.com](mailto:abzmtk@gmail.com)

### Abstract

**Background:** Growth monitoring (GM) is a preventive activity that serves as the core function in an integrated child health and nutrition program. In most developing nations, including Ethiopia, however, the use of growth monitoring and promotion services is insufficient. Hence, the purpose of this study was to evaluate the use of GM services and associated characteristics among mother of infants in Mettu town, Southwest Ethiopia.

**Objective:** To assess the utilization of growth monitoring service by mothers of infants in Mettu town, Southwest Ethiopia, 2021.

**Method:** A community-based cross-sectional study was conducted among 354 randomly selected mothers with children aged 0–23 months old from June 25 to July 27, 2021 in Mettu town. Epi-data version 4.6.0 was used to enter data, which was then exported to SPSS version 25 for analysis. Simple binary and multivariable logistic regression were performed to identify factors associated with GM service utilization.

**Results:** A total of 354 study participants were included in the study yielding a response rate of 95.2%. The proportion of GM service utilization was 25.2% [95% CI: 20.24-29.33]. In multivariable regression analysis, Age of index child 0-11months [AOR(Adjusted Odds Ratio)=1.58; (95% CI: 1.052, 3.713)], early-PNC (Postnatal Care) [AOR=1.72; (95% CI=1.657, 6.467)], middle tertile wealth status [AOR=0.108; (95% CI 0.047-0.319)] and lower tertile wealth status [AOR=0.073; (95% CI (0.013-0.874)],utilization of family health card [AOR=2.09; (95% CI; 1.384, 5.343)] and taking  $\leq$  30minutes to reach the nearest health facility [AOR=2.23; (95%CI: 2.061, 7.350)] were significantly associated with GM service utilization.

**Conclusion and recommendation:** In this study, only one-fourth of mothers with children aged 0–23 months old were utilizing GM services. GM service utilization was found to be significantly associated with child age, early-PNC visit, wealth status, utilization of family health card, and time taking  $\leq 30$  minutes to reach the nearest health facility. Hence, appropriate strategies that promote and encourage GM service utilization should be designed .

**Key words:** Growth Monitoring, Utilization, Mettu town, Children Aged 0-23Months

## 1. Introduction

Growth monitoring is defined as the regular measurement, plotting, and interpreting of a child's growth on a regular basis in order to respond when abnormal growth is noticed, with the aim of improving the child's nutritional status. Improved nutritional status, increased utilization of health care services, and subsequently a reduction in mortality are the main potential advantages of growth monitoring service [1-2].

The majority of growth monitoring services are provided in health institutions or in communities. The main advantages of growth monitoring are that it helps families and community workers to identify children with growth failure early, when it is easier to intervene [3–5].

Child growth and development is one of the major public health problems in low and middle income countries [6]. Poor child growth is attributed to a greater childhood mortality as a result of severe infections and increased susceptibility to common childhood illnesses, which account for the majority of deaths among children under the age of five [7]. Malnutrition is directly or indirectly responsible for about half of all childhood deaths worldwide [8]. In 2019, there were 149 million children under the age of five in the world. Out of those, 49 million were stunted, 17 million were severely wasted, and 40 million were overweight [9].

In Ethiopia, child malnutrition is a serious public health concern. According to the Ethiopian Mini Demographic and Health Survey of 2019, 37% of children under the age of five were stunted, 21% were underweight, and 7% were wasted. Similarly, in the Oromia region, 35.6% of children were stunted, 16.1% were underweight, and 4.7% were wasted [10]. In terms of the country's economic losses, the estimated annual cost of child malnutrition is 55.5 billion Ethiopian birr (ETB), or 16.5% of GDP [11].

The most cost-effective method for tracking the challenging public health problem of malnutrition is through various preventive techniques, including GM service. This includes ensuring that all children

1  
2  
3 who were normal weight at birth remain in that range, and that those who were low weight at birth  
4 are quickly brought into a healthy growth range [3].  
5  
6

7 It is critical to promote and improve a child's health during the window of opportunity that lasts from  
8 conception to the child's second birthday [12]. Despite the fact that GM is one of the activities that  
9 the Ethiopian government is currently focusing on to combat child malnutrition, only a few mothers  
10 brought their children for this service [13,14]. Studies done in different parts of Ethiopia revealed  
11 that only 16.9-38.9% of mothers were attending GM services [14–19]. Lack of appropriate  
12 information about GM service, lack of support from husbands, distance from the health facility,  
13 pastoral life style, and cultural issues such as the fear of “evil eye” were factors contributing to the  
14 utilization of GM service [17, 20].  
15  
16  
17  
18  
19  
20

21 The irregularity of the GM session due to health extension work load, not recording the age and  
22 weight of the child accurately, the mother's wrong belief, and the skill gap of health extension  
23 workers were challenges to GM service utilization [17]. Since 2008, Ethiopia has adopted GM as a  
24 nutrition-specific intervention, but utilization of growth monitoring services has been limited [13].  
25  
26  
27  
28

29 However, limited evidence is available on the level of utilization of the GM services in Mettu town.  
30 Hence, this study is intended to find out how widely GM services are being utilized and what factors  
31 have affected the program in Mettu town.  
32  
33

## 34 **2. Materials and Methods**

### 35 **2.1. Study area and period**

36  
37  
38 The study was conducted in Mettu town from June 25 to July 27, 2021, which is located in the  
39 I/A/Bor Zone, Oromia region, Southwest Ethiopia and is 542 km from Addis Ababa, the capital city  
40 of Ethiopia. Mettu is a market town with six administrative kebeles. One health center, one  
41 specialized hospital, and three health posts are found in the town. The total population of the town is  
42 estimated to be 49,538. The under five and under two age groups were estimated to be 8,139 and  
43 2,828 respectively.  
44  
45  
46  
47  
48  
49  
50

### 51 **2.2. Study design and Population**

52  
53  
54  
55 A Community-based cross-sectional study was employed from June 25 to July 27/2021. All mothers  
56 who have children aged 0-23 months old and live in Mettu town were the source population, whereas  
57  
58  
59  
60



mothers who have children aged 0-23 and selected by simple random sampling from the sampling frame were the study population and included in the study.

### 2.3 Eligibility Criteria

**Inclusion Criteria** : Mothers with children aged 0-23 months old who have lived in Mettu town for at least 6 months were included in the study.

**Exclusion Criteria** : Mothers who were unable to respond due to medical or psychiatric illness were excluded.

### 2.4. Sample size Determination

The minimum required sample size was calculated using a double population proportion formula using Epi Info™ version 7 by considering the assumptions, (80%) power of the study, 95% confidence level, 1:1 ratio and proportion of outcome for the variable, place of delivery (33.33% exposed and 10.33% non-exposed). After adding a 10% non- response rate the final sample size for the study was 372(table 1).

**Table 1: Sample size determination to assess the utilization of Growth Monitoring Service by Mothers of Infants in Mettu town, South west Ethiopia, 2021**

| S/<br>N | Variable                                 | Assumptions |              |       |      |                             |                | Sample<br>size | Reference |
|---------|------------------------------------------|-------------|--------------|-------|------|-----------------------------|----------------|----------------|-----------|
|         |                                          | CI<br>(%)   | Power<br>(%) | Ratio | AOR  | Proportion<br>of<br>outcome |                |                |           |
|         |                                          |             |              |       |      | Exposed                     | Non<br>exposed |                |           |
| 1.      | Place of delivery                        | 95          | 80           | 1:1   | 3.0  | 33.33%                      | 10.33%         | 372            | [18]      |
| 2.      | Family health card                       | 95          | 80           | 1:1   | 5.09 | 57.86%                      | 11.14%         | 139            | [20]      |
| 3.      | Distance from near<br>by health facility | 95          | 80           | 1:1   | 4.53 | 33.90%                      | 8.0%           | 359            | [19]      |

### 2.5 Sampling techniques and procedures

To achieve the desired sample size, all six urban kebeles were included in the study.. Initially, a sampling frame containing a list of 2,828 containing mothers-child pairs aged 0-23 months old along with the child's date of birth and house number was obtained from the respective health posts. Then samples representing each kebele were calculated using a proportional to population size allocation.

1  
2  
3 Finally, a simple random sampling technique was employed using computer-generated program  
4 (Microsoft-excel) to select a total of 372 samples from the six urban kebeles.  
5  
6

## 7 **2.6 Data collection procedures and tools**

8  
9  
10 Data was collected from mothers using a semi-structured interviewer administered questionnaire.  
11 The questionnaire was adapted from previous similar studies [17,20,22]. The questionnaire was first  
12 prepared in English and then translated to Afan Oromo and back to English to check the consistency  
13 by an expert who had good ability in both languages. The questionnaire was divided into five  
14 sections: socio-demographic and economic information; child and maternal health characteristics and  
15 mother-child feeding knowledge; maternal knowledge of the WHO growth chart and GM service;  
16 and the availability and accessibility of health services.  
17  
18

19 Data was collected by six Diploma clinical nurses and two BSc nurses were recruited as supervisors  
20 during data collection. The younger child from the household was taken as an index child, and if twin  
21 children were found within one household, data was taken from one of them using the lottery  
22 method. If an eligible mother was absent during the data collection period, a revisit was done three  
23 times, and mothers absent on the third visit were considered non-respondent.  
24  
25

## 26 **2.7 Data quality control**

27 Before data collection, the questionnaires were pretested on a 5% (20) sample size in another town,  
28 which was not part of the actual data collection area. Based on the pretest, some modifications, such  
29 as unclear or vague questions and wrong skip patterns, were corrected. Two days of training were  
30 given for data collectors and supervisors by the principal investigator on data collection tools, data  
31 collection techniques, approach to the interviews, and maintaining the privacy and confidentiality of  
32 the respondents. Every day after data collection, the questionnaires were reviewed and checked for  
33 completeness by the supervisors and the principal investigator.  
34  
35

## 36 **2.8 Patient and public involvement**

37 No patient involved in this study.  
38  
39

## 40 **2.9 Operational definition**

- 41  
42  
43  
44  
45  
46  
47  
48  
49  
50  
51  
52  
53  
54  
55 ✓ **GM Utilization:** If mother participated in the GM services at least once for 0 month old  
56 child, at least two times for 1-3 months old child, at least five times for 4-11 months and at  
57  
58  
59  
60

1  
2  
3 least four times per year for 12-23 months old child. In addition, it should be plotted or  
4 recorded on the child growth chart [18,23].

- 5  
6  
7 ✓ **Family health card utilization:** The mother is considered to have utilized the family health  
8 card if she had the cards at home, plotted and able to interpret information displayed on the  
9 weight for age child growth chart during every GM session.
- 10  
11 ✓ **Early Postnatal care:** is the care given to the women and her new-borns at least once from  
12 the second days through seventh days after delivery [24].
- 13  
14 ✓ **Family health card:** is book which contains the weight for age child growth chart for both  
15 sexes and used to plot the growth pattern of the child attending GM session and would to be  
16 held by the mother.
- 17  
18 ✓ **Wealth index:** it is measured using fixed household asset. Factor score was derived using  
19 PCA (Principal Component Analysis) then the composite score was ranked in to three tertiles  
20 [25].  
21  
22  
23  
24  
25

## 26 27 **2.10 Data processing and analysis**

28  
29 All data were checked visually, coded, and entered into Epi-data version 4.6.0 before being exported to  
30 SPSS version 25 for analysis. Descriptive statistics (frequency and cross- tabulation) were calculated  
31 for variables. The results were presented in the form of tables and text using frequencies and  
32 summary statistics such as mean, standard deviation, and percentage to describe the study population  
33 with relevant variables.  
34  
35  
36  
37

38  
39 Before performing Principal Component Analysis (PCA) for variables explaining the household  
40 wealth index, all the necessary assumptions and prerequisites were checked. The degree of  
41 association between independent and dependent variables was assessed using an odds ratio with a  
42 95% confidence interval. A simple binary logistic regression analysis was performed to select  
43 candidate variables for multivariable regression analysis. Variables with  $p$ -value $<0.25$  were taken as  
44 a cut-off point to select eligible variables for the multivariable regression analysis, and a  $p$ -  
45 value $<0.05$  was declared as statistically significant in the final model.  
46  
47  
48  
49  
50  
51

52 Pseudo regression was performed to check multi-collinearity between independent variables. The  
53 minimum tolerance and maximum variance inflation factor (VIF) were found to be 0.80 and 1.89,  
54 respectively. For the finally fitted multivariable logistic regression model, the adequacy of the model  
55 to predict the outcome variables was checked by Hosmer-Lemeshow goodness-of-fit and  $p$ -  
56 value $>0.05$ .  
57  
58  
59  
60

### 3. RESULT

#### 3.1. Socio-demographic and economic characteristics of households

In this study, a total of 354 mother-child pairs were included, yielding a response rate of 95.2%. The mean age (month) of the children was 11.25(6.433) and more than half the children, 187(52.8%), belonged to the age category below 11 months. Regarding the age of respondents, the majority 329,(92.9%) of them were in the age category below 30. The mean age (year) of the mothers was 24.91(3.472). More than half of the respondents 181(51.2%) attended secondary and above education . Nearly half 160(45.3%) of the respondents were housewives. In terms of wealth status , 116(32.8%) and 93 (26.2%) ranked in the higher and lower tertiles, respectively (table 2).

**Table 2:Demographic and socio-economic characteristics of Mothers of Infants in Mettu town, 2021 (n=354)**

| Variable              | Categories          | Frequency | Percentage |
|-----------------------|---------------------|-----------|------------|
| Sex of the child      | Male                | 184       | 51.98      |
|                       | Female              | 170       | 48.02      |
| Age of a child/months | 0-11                | 187       | 52.8       |
|                       | 12-23               | 167       | 47.2       |
| Maternal Age          | <30                 | 329       | 92.9       |
|                       | ≥30                 | 25        | 7.1        |
| Religion of mother    | Orthodox            | 136       | 38.5       |
|                       | Muslim              | 111       | 31.4       |
|                       | Protestant          | 96        | 27         |
|                       | Others*             | 11        | 3.1        |
| Ethnicity of Mother   | Oromo               | 289       | 81.7       |
|                       | Amhara              | 36        | 10.1       |
|                       | Gurage              | 14        | 4.00       |
|                       | Others**            | 15        | 4.20       |
|                       | No formal education | 32        | 9.0        |
| Level of education    | Primary             | 141       | 39.8       |
|                       | Secondary and above | 181       | 51.2       |
| Occupational status   | House wife          | 160       | 45.3       |
|                       | Merchant            | 36        | 10.2       |
|                       | Government employee | 53        | 14.9       |
|                       | Private employee    | 48        | 13.7       |
|                       | Student             | 39        | 10.9       |
|                       | Others***           | 18        | 4.97       |

|                        |                |     |      |
|------------------------|----------------|-----|------|
| Current marital status | Married        | 321 | 90.7 |
|                        | Single         | 20  | 5.6  |
|                        | Divorced       | 11  | 3.1  |
|                        | Widowed        | 2   | 0.6  |
| Family size            | <3             | 96  | 27.2 |
|                        | 4-5            | 165 | 46.5 |
|                        | >5             | 93  | 26.3 |
| Wealth status          | Lower tertile  | 93  | 26.2 |
|                        | Middle tertile | 145 | 41.0 |
|                        | Higher tertile | 116 | 32.8 |

\*Catholic, Wakefata, & Jiohava \*\*Kambata, Hadiya, Tigre, Agnuak & Nuer \*\*\*Daily labourer

### 3.2. Information on availability of health facility with specific health services

In this study, nearly half 168(47.5%) of the study participants took thirty minutes or less to reach the nearest health facility. More than two-thirds (272(76.7%) of respondents prefer to go to health centres for their children's care. Regarding the perceived awareness of the respondents to the availability of GMP services, half of 187 (52.8%) of the respondents were aware of the availability of GMP services at health facilities (table 3).

**Table 3: Information on availability and accessibility of health services among mother-child pair, Mettu town, 2021(n=354)**

| Variable                                                        | Category       | Frequency | Percentage |      |
|-----------------------------------------------------------------|----------------|-----------|------------|------|
| Time it takes to the nearest health facility                    | ≤30minutes     | 168       | 47.5       |      |
|                                                                 | >30minutes     | 186       | 52.5       |      |
| The most frequently visited health facility for child care.     | Health centre  | 272       | 76.7       |      |
|                                                                 | Health post    | 9         | 2.5        |      |
|                                                                 | Private clinic | 51        | 14.3       |      |
|                                                                 | Hospital       | 23        | 6.5        |      |
| Perceived awareness on availability of specific health Services | ANC            | Yes       | 318        | 89.8 |
|                                                                 |                | No        | 36         | 10.2 |
|                                                                 | Delivery       | Yes       | 301        | 85.1 |
|                                                                 |                | No        | 53         | 14.9 |
|                                                                 | PNC            | Yes       | 242        | 68.3 |
|                                                                 |                | No        | 112        | 31.7 |
| GMP                                                             | Yes            | 187       | 52.8       |      |

No 167 47.2

### 3.3. Information on utilization of maternal and child health service

Among 354 mothers who participated in this study, more than half 181 (55.5%) the mothers had ANC follow-up with a frequency of visits of four or more. The majority of the mothers 334(94.4%) delivered at health institutions, but only one third 123(34.8%) of the mothers had an early PNC. (table 4).

**Table 4: Variables used to assess the information on MCH service among mothers and their children, Mettu, Ethiopia, 2021 (n=354)**

| Variable                        | Category                | Frequency | Percentage |
|---------------------------------|-------------------------|-----------|------------|
| ANC follow-up                   | No                      | 25        | 7.1        |
|                                 | Yes                     | 329       | 92.9       |
| Frequency of ANC follow-up      | <4 visits               | 147       | 44.8       |
|                                 | ≥ 4 visits              | 181       | 55.5       |
| Place of delivery               | Home                    | 20        | 5.6        |
|                                 | Health institution      | 334       | 94.4       |
| Early-PNC                       | No                      | 231       | 65.2       |
|                                 | Yes                     | 123       | 34.8       |
| Vaccination status of the child | Not vaccinated          | 9         | 2.5        |
|                                 | Vaccinating             | 137       | 38.8       |
|                                 | Defaulter               | 6         | 1.6        |
|                                 | Fully vaccinated        | 202       | 57.1       |
| Reason for not vaccinated       | Distance to EPI sites   | 1         | 12.5       |
|                                 | Do not know the benefit | 8         | 87.5       |

### 3.4. Reasons for frequent health facility visits by Mothers

This study revealed that nearly two-thirds 209( 59.0%) of the mothers frequently visit health facilities to have their children vaccinated, but only 15(4.3%) of the mothers who participated in the study took their children for weighing or GM service (figure 1).

### 3.5. Child feeding and growth monitoring knowledge of Mothers

The finding of this study reported that, the majority of the respondents 310(87.6%) were counselled on child feeding. Almost all respondents 347(98.1%) provided breast milk to their babies immediately after birth. Nearly half 166(46.9%) of the study participants were utilizing family health cards, and the majority (153(92.05%) of those utilizing mothers were able to read and interpret information displayed on the growth chart (table 5).

**Table 5:Child feeding and growth chart knowledge of mothers, Mettu town, 2021 (n=354)**

| Variable                                           | Category               | Frequency | Percentage |
|----------------------------------------------------|------------------------|-----------|------------|
| Counselled by HCWs on child feeding                | No                     | 44        | 12.4       |
|                                                    | Yes                    | 310       | 87.6       |
| The first thing given after birth                  | Breast milk            | 347       | 98.1       |
|                                                    | Other*                 | 7         | 1.86       |
| Time for BF initiation immediately after birth     | Within 1hr             | 342       | 96.7       |
|                                                    | Greater than 1hr       | 11        | 3.1        |
| Duration of EBF                                    | 3 months               | 7         | 1.9        |
|                                                    | 6 months               | 344       | 97.2       |
|                                                    | 1 year                 | 3         | 0.9        |
| Total duration of BF                               | Below 2year            | 33        | 9.33       |
|                                                    | 2year and greater      | 321       | 90.68      |
| Do utilize family health card at home.             | No                     | 188       | 53.1       |
|                                                    | Yes                    | 166       | 46.9       |
| Can you read information displayed on growth chart | No                     | 13        | 7.95       |
|                                                    | Yes                    | 153       | 92.05      |
| Who thought you                                    | HCWs                   | 99        | 64.95      |
|                                                    | By my self             | 46        | 30.01      |
|                                                    | HEWs                   | 8         | 5.04       |
| What does it mean if growth curve flattens         | Child not growing well | 72        | 46.8       |
|                                                    | Child may be sick      | 31        | 20.3       |
|                                                    | Child not eating well  | 50        | 32.9       |
| What does it mean if growth curve rising           | Child gaining weight   | 89        | 58.4       |
|                                                    | Child is healthy       | 16        | 10.6       |

|                                               |                                    |    |      |
|-----------------------------------------------|------------------------------------|----|------|
|                                               | Child is eating well               | 48 | 31.0 |
| What does it mean, if growth curve is falling | Child is not gaining weight        | 66 | 43.2 |
|                                               | Child may be sick or has been sick | 36 | 23.4 |
|                                               | Child is not eating well           | 51 | 33.4 |

Other\* Formula milk, water, cow milk

### 3.6. Utilization of GM services

This study revealed that one-fourth of 89(25.2%) mothers utilized GM service with [95% CI 20.24–29.33]. Of those respondents who participated in this study, nearly two-thirds 196 (60.9%) knew the benefit of GM. Regarding the benefits of the GM service, half 108(50.5%) of the respondents reported the GM service is used "to monitor the child's growth". More than two-thirds 59(66.7%) of the respondents followed GM sessions at health centers (**table 6**).

**Table 6: Variables to assess utilization of GM, Mettu town, 2021 (n=354)**

| Variable                                             | Category              | Frequency | Percentage |
|------------------------------------------------------|-----------------------|-----------|------------|
| GM utilization status                                | Utilized              | 89        | 25.2       |
|                                                      | Not utilized          | 265       | 74.8       |
| Know benefit of regular GM session                   | Yes                   | 216       | 60.9       |
|                                                      | No                    | 138       | 29.1       |
| Benefit of regularly taking the child for GM session | To monitor growth     | 108       | 50.0       |
|                                                      | To seek medical care  | 7         | 3.06       |
|                                                      | To know health status | 101       | 46.94      |
| Place where GMservice given                          | Health centre         | 59        | 66.7       |
|                                                      | EPI outreach sites    | 8         | 8.45       |
|                                                      | Health posts          | 22        | 24.85      |
| Who provides the service                             | HEWs                  | 30        | 33.15      |
|                                                      | HCWs                  | 59        | 66.8       |



### 3.6.1 Reasons for not taking the child for GM session

This study reported that, more than one-thirds 135(38.2%) of the respondents who missed taking the child for GM sessions didn't know the benefits of the GMservices, and 102(28.9%) of the mothers lacked information about the services (**Figure 2**).

### 3.7. Factors associated with GM service utilization

On multivariable logistic regression analysis, mothers with children aged 0-11 months old [AOR=1.58; (95% CI:(1.052, 3.713)], mothers who had early-PNC [AOR=1.72; (95% CI :( 1.657, 6.467)], mothers from households with middle and [AOR=0.108; (95% CI 0.047-0.319)] and lower tertile [AOR=0.073; (95% CI: (0.013-0.874)], mothers utilizing family health card at home [AOR=2.09; (95% CI; 1.384, 5.343)]. Mothers who took thirty minutes and below to reach the nearest health facility [AOR=2.24; (95%CI: 2.061, 7.350)] were factors significantly associated with utilization of GM service (**table 7**).

**Table 7: Bi-variable and multi-variable logistic regression analysis of Utilization of Growth Monitoring Service by Mothers of Infants in Mettu town, 2021(n=354)**

| Variable                    | Category            | Utilization of GM service |            | 95% CI             |                             |
|-----------------------------|---------------------|---------------------------|------------|--------------------|-----------------------------|
|                             |                     | Yes(%)                    | No(%)      | COR                | AOR                         |
| Age of index child          | 12-23months         | 32(9.01)                  | 135(38.2)  | 1                  | 1                           |
|                             | ≤11months           | 57(16.15)                 | 130(36.6)  | 1.87(1.112-3.143)  | <b>1.58(1.052-3.713)**</b>  |
| Frequency of ANC visit      | <4                  | 28(7.91)                  | 107(30.22) | 1                  |                             |
|                             | ≥4                  | 61(17.23)                 | 110(31.07) | 2.12(1.204-3.519)  | 1.16(0.579-2.305)           |
| Early-PNC                   | No                  | 46(13.04)                 | 185(52.2)  | 1                  |                             |
|                             | Yes                 | 43(12.1)                  | 80(22.7)   | 2.14(1.277-3.577)  | <b>1.72(1.657-6.467)**</b>  |
| Maternal level of education | No formal education | 6(1.60)                   | 26(7.40)   | 1                  |                             |
|                             | Primary             | 27(7.51)                  | 114(32.25) | 1.17(0.404-3.356)  | 0.645(0.179-2.320)          |
|                             | Secondary and above | 56(15.8)                  | 125(35.4)  | 2.15(0.775-5.946)  | 0.319(0.088-1.160)          |
| Wealth status               | Higher tertile      | 62(17.5)                  | 54(15.25)  | 1                  | 1                           |
|                             | Middle tertile      | 17(4.80)                  | 128(36.16) | 0.116(0.016-0.311) | <b>0.108(0.047-0.319)**</b> |

|                  |               |           |            |                    |                             |
|------------------|---------------|-----------|------------|--------------------|-----------------------------|
|                  | Lower tertile | 10(2.82)  | 83(23.45)  | 0.099(0.012-0.697) | <b>0.073(0.013-0.874)**</b> |
| Family health    | No            | 33(9.31)  | 155(43.8)  | 1                  |                             |
| card utilization | Yes           | 56(15.8)  | 110(31.1)  | 2.40(1.427-4.027)  | <b>2.09(1.384-5.343)**</b>  |
| Perceived        | No            | 27(7.76)  | 133(37.6)  | 1                  |                             |
| awareness on     | Yes           | 62(17.4)  | 132(37.3)  | 2.26(1.323-3.858)  | 1.67(0.871-3.203)           |
| GMP availability |               |           |            |                    |                             |
| Time to reach    | >30minutes    | 31(8.76)  | 155(43.78) | 1                  |                             |
| nearby health    | ≤ 30minutes   | 58(16.38) | 110(31.07) | 2.64(2.410-7.297)  | <b>2.23(2.061-7.350)**</b>  |
| facility         |               |           |            |                    |                             |

**Note:** \*\* denote statistically significant variables in multivariable logistic regression at *p-value* <0.05, COR: Crude Odds Ratio, AOR: Adjusted Odds Ratio

#### 4. DISCUSSION

GM services are essential until the child's second birthday in order to have a healthy and well-nourished child and to break the intergenerational cycle of malnutrition. Hence, this study was aimed to assess utilization of growth monitoring services and associated factors among mothers of children aged 0–23 months old in Mettu town. The proportion of GM service utilization in this study area was found to be 25.2% with [95% CI: 20.24.-29.33]. This finding is comparable with a study conducted in rural lower part of Ghana 28.5% and Northern Ethiopia 30.7% [20,26].

The finding of this study is lower compared to a study conducted in the Lawra district of Ghana 70% and Nyamira country of Kenya 53.3% [16, 27]. The inconsistency might be due to differences in socio-economic characteristics among the study population, study design and, study period.

However, the finding of the current study was higher compared to a study done in Thika sub-city of Kenya 20%, Mareka district, southern Ethiopia 16.9% and, Butajira District, Southern Ethiopia 11% [17-18, 28]. Differences in study setting, socioeconomic and demographic characteristics of study participants, and study period could all explain the disparity..

The age of the index child was found to be significantly associated with the utilization of growth monitoring and promotion services. Mothers with index children under 11 months were 1.5 times more likely to utilize service compared to mothers with index children aged 12–23 months old. The possible explanation might be that children under 11 months old are recommended to go to health facility for several doses of immunization. Thus, most mothers will continue to send them to

weighing centers until completion of the immunization. However, as the child's age advances, attendance at GM sessions decreases. This finding is similar to a study conducted in rural Ghana, which discovered a negative correlation between child age and GM service utilization [26]. In contrast to this finding, a study conducted in the Legambo districts of South Wollo zone and Mareka found that mothers with index children aged 12-24 months were more likely to utilize GM services than those aged 11 months or less [18-19]. The inconsistency might be due to the differences in study design and sampling technique employed. The study conducted in Legambo district used an unmatched case-control study design, which may have contributed to this variation.

This study found that mothers who had early-PNC were 1.7 times more likely to utilize growth monitoring services compared to those mothers who had no early-PNC. This relationship between early PNC service and the higher utilization of GM could be explained by the child nutrition and health counseling that are provided as part of the PNC service. As a result, they could get more opportunities to receive child growth and development counseling. This study is supported by the a study conducted in Benin that reported mothers who had early PNC were more likely to utilize maternal and child health services [29].

Utilization of family health cards was another predictor of growth monitoring services in this study. Those mothers utilizing family health cards were 2 times more likely to utilize growth monitoring services compared to those who were not. This might be due to the possibility of family health cards motivating mothers to get GM service. This finding is congruent with a study done in Yilmana woreda of northern Ethiopia [20].

Compared to mothers from households with higher tertile wealth status, mothers from households with lower and middle tertile wealth status were 89% and 92% less likely to utilize GM services, respectively. The study done in Southern Ethiopia supports this finding [18]. The possible explanation could be that people with lower household tertile might be busy fulfilling their day-to-day livelihood needs and have limited time to attend the GM service.

The time it takes to reach a nearby health facility was found to be significantly associated with GM service utilization. Those mothers who took less than 30 minutes to reach a nearby health facility were 2 times more likely to utilize GM than those mothers who took more than 30 minutes to reach a nearby health facility. This finding was in line with the studies conducted in Yilmana Dedisa and

1  
2  
3 Butajira district [17,20]. This could be because mothers who live near a health facility can bring their  
4 children for GM service quickly and return to work, even if they are busy at work.  
5  
6  
7

#### 8 **4.1. Strength and Limitation of the study**

9  
10 There are certain limitations to this research. First, since the data was collected by the verbal report of the  
11 participants, there might be a possibility of response bias. Data collectors were trained on some techniques  
12 of reducing a response bias during the interview. Second, the study did not assess the qualitative  
13 perspective of GM service utilization.  
14  
15

### 16 **5. Conclusions and Recommendation**

17  
18  
19 The study found that only one-fourth of mothers with children aged 0-23 months in Mettu town were  
20 utilizing GM services. GM service utilization was significantly associated with index child age,  
21 early-PNC, use of family health card, wealth status, and time to reach nearby health facility. Hence,  
22 appropriate strategies that promote and encourage GM service utilization should be designed .  
23  
24  
25

#### 26 **Abbreviation**

27  
28  
29 AOR: Adjusted Odds Ratio; COR: Crude Odds Ratio; CI: Confidence Interval, GM: Growth  
30 Monitoring , HEW: Health Extension Worker, ANC: Antenatal Care, PNC: Postnatal Care, NNP:  
31 National Nutrition Program.  
32  
33

#### 34 **Authors' contributions**

35  
36  
37 YT; developed the research idea, design, analysis, and drafted the manuscript. AM, SHSH, and KB  
38 conceived the study, supervised the data collectors, interpret the result and reviewed the manuscript.  
39 All authors read and approved the final manuscript. YT is responsible for the overall content as  
40 guarantor.  
41  
42

#### 43 **Data Availability**

44  
45 The data sets analyzed during the current study are available from the corresponding author on  
46 reasonable request.  
47  
48

#### 49 **Acknowledgment**

50  
51 We would like to acknowledge Mettu University, the department of Public Health, and Mettu town  
52 health office for their support throughout the study period. We are also grateful to data collectors,  
53 supervisors, and study participants for their valuable contributions.  
54  
55

#### 56 **Funding**

57  
58 The authors did not get any funding for his study, and it was entirely supported by the authors.  
59  
60

## Ethical Approval and Consent to Participate

Ethical clearance was obtained from the ethical review board of Mettu University, College of Health Science (Ref. No.RPG 42/20) submitted to Mettu town health office. The letter of permission was obtained from Mettu town health office. Before beginning the data collection, written consent was obtained from the study participants after clear information was provided about the objectives of the study. The study was conducted in accordance with the Helsinki Declaration.

## Conflict of Interest

The authors declare that they have no competing interests regarding the publication of this article.

## REFERENCES

- [1] P. Garner, R. Panpanich, and S. Logan, "Is routine growth monitoring effective? A systematic review of trials... including commentary by Davies DP.," *Arch. Dis. Child.*, vol. 82, no. 3, pp. 197–201, 2000, [Online]. Available: <http://www.epistemonikos.org/documents/e2b62e1929a334513c1b4fd795155729f2284025>.
- [2] A. Ashworth, R. Shrimpton, and K. Jamil, "Growth monitoring and promotion: Review of evidence of impact," *Matern. Child Nutr.*, vol. 4, no. SUPPL.1, pp. 86–117, 2008, doi: 10.1111/j.1740-8709.2007.00125.x.
- [3] M. Griffiths and J. Del Rosso, "GROWTH MONITORING AND THE PROMOTION OF HEALTHY YOUNG CHILD GROWTH: Evidence of Effectiveness and Potential to Prevent Malnutrition," *Matern. Child Nutr.*, no. November, pp. 86–117, 2008.
- [4] UNICEF, "Experts' consultation on growth monitoring and promotion strategies : Program guidance for a way forward Recommendations from a Technical Consultation UNICEF Headquarters New York , USA," pp. 1–8, 2008.
- [5] N. Mangasaryan, M. Arabi, and W. Schultink, "Revisiting the concept of growth monitoring and its possible role in community-based nutrition programs," *Food Nutr. Bull.*, vol. 32, no. 1, pp. 42–53, 2011, doi: 10.1177/156482651103200105.
- [6] C. Lu, M. M. Black, and L. M. Richter, "Risk of poor development in young children in low-income and middle-income countries: an estimation and analysis at the global, regional, and country level," *Lancet Glob. Heal.*, vol. 4, no. 12, pp. e916–e922, 2016, doi: 10.1016/S2214-109X(16)30266-2.
- [7] UNICEF, *Tracking Progress on Child and Maternal Nutrition*. 2009.
- [8] Levels and trends in child malnutrition: key findings of the 2018 Edition of the Joint Child Malnutrition Estimates. Geneva: World Health Organization; 2018 ..

- 1  
2  
3 [9] WHO and W. Bank, “Levels and trends in child malnutrition,” 2019.  
4  
5 [10] Ethiopian Mini Demographic and Health Survey. 2019.  
6  
7 [11] Afrfrican development bank and agance frace development Wfp, “The Cost of hunger in  
8 Africa: Ethiopia WFP,” 2014.  
9  
10 [12] Investing In Nutrition The Foundation For Development. An Investment Framework To Reach  
11 The Global Nutrition Targets” 2015.  
12  
13 [13] “Nutrition Program Planning and Supervision : For Health and Agriculture Program  
14 Managers Reference Manual July 2013 Nutrition  
15  
16 [14] A. Yeshaneh, T. Fentahun, T. Belachew, A. Mohammed, and D. Adane, “Utilization of  
17 growth monitoring and promotion services and associated factors among children aged 0-23  
18 months in Banja District, Northwest Ethiopia 2020: A crosssectional study,” *PLoS One*, vol.  
19 16, no. 11 November 2021, pp. 1–14, 2021, doi: 10.1371/journal.pone.0259968.  
20  
21 [15] S. M. Bilal, A. Moser, R. Blanco, M. Spigt, and G. J. Dinant, “Practices and challenges of  
22 growth monitoring and promotion in Ethiopia: A qualitative study,” *J. Heal. Popul. Nutr.*, vol.  
23 32, no. 3, pp. 441–451, 2014.  
24  
25 [16] D. Tuobom Debuo, “Caregivers Knowledge, Attitude and Practices on Child Growth  
26 Monitoring and Promotion Activities in Lawra District, Upper West Region of Ghana,” *Sci. J.*  
27 *Public Heal.*, vol. 5, no. 1, p. 20, 2017, doi: 10.11648/j.sjph.20170501.13.  
28  
29 [17] L. Desalegne, S. Shiferaw, D. Haile, and T. Submitted, “Assessment of Knowledge and  
30 Utilization of Growth Monitoring and Promotion for under two children in Butajira, Ethiopia  
31 2017,” no. June, 2017.  
32  
33 [18] F. W. Feleke, A. A. Adole, and A. M. Bezabih, “Utilization of growth monitoring and  
34 promotion services and associated factors among under two years of age children in Southern  
35 Ethiopia,” *PLoS One*, vol. 12, no. 5, pp. 1–9, 2017, doi: 10.1371/journal.pone.0177502.  
36  
37 [19] S. Dagne, “Determinants of Growth Monitoring and Promotion Service Utilization Among  
38 Children 0-23 Months of Age in Northern Ethiopia : Unmatched Case Control Study,” *Res.*  
39 *Sq.*, vol. 1, pp. 15–20, 2020.  
40  
41 [20] S. Yeniew, “Utilization of Growth Monitoring and Promotion Service By Mothers of Children  
42 0-23 Months Old in Yilmana Denisa Woreda ,” 2020.  
43  
44 [21] S. Dagne, J. Aliyu, Y. Member, Y. Wassihun, P. Petrucka, and N. Fentahun, “Determinants of  
45 growth monitoring and promotion service utilization among children 0–23 months of age in  
46 northern Ethiopia: unmatched case-control study,” *BMC Nutr.*, vol. 7, no. 1, 2021, doi:  
47 10.1186/s40795-021-00470-y.  
48  
49  
50  
51  
52  
53  
54  
55  
56  
57  
58  
59  
60

- 1  
2  
3 [22] M. Tekle, B. Tariku, A. Alagaw, E. Zerihun, and H. W. Bekele, "Exploring Reasons for Low  
4 Attendance of Mothers to Growth Monitoring and Promotion Program at Loka Abaya District,  
5 Southern Ethiopia: Exploratory Qualitative Study," *J. Nutr. Metab.*, vol. 2019, pp. 6–7, 2019,  
6 doi: 10.1155/2019/3510649.  
7  
8  
9  
10 [23] M. Faber, M. A. S. Phungula, J. D. Kvalsvig, and A. J. S. Benadé, "Acceptability of  
11 community-based growth monitoring in a rural village in South Africa," *Food Nutr. Bull.*, vol.  
12 24, no. 4, pp. 350–359, 2003, doi: 10.1177/156482650302400405.  
13  
14 [24] T. G. Gebrehiwot *et al.*, "Prevalence and associated factors of early postnatal care service use  
15 among mothers who had given birth within the last 12 months in Adigrat town, Tigray,  
16 northern Ethiopia, 2018," *Int. J. Womens. Health*, vol. 12, pp. 869–879, 2020, doi:  
17 10.2147/IJWH.S266248.  
18  
19 [25] EDHS, *FEDERAL DEMOCRATIC REPUBLIC OF ETHIOPIA Demographic and Health*  
20 *Survey*. 2016.  
21  
22 [26] F. Seidu, "Utilisation of Growth Monitoring and Promotion is Highest Among Children Aged  
23 0-11 Months : A Survey Among Mother-Child Pairs From Rural."  
24  
25 [27] Jane Ilusa Nyabuti "Factors associated with the continuation of growth monitoring among  
26 children 10 to 59 months old," vol. 1, pp. 5–6, 2015.  
27  
28 [28] K. Lucy Mwari, M. N. Keraka Professor, K. University, and K. A. Jemimah Simbauni, "Care  
29 Giver Deteminants Of Utilization Of Growth Monitoring Clinic Among Children Aged 12-59  
30 Months In Urban Kiambu County, Kenya," *Int. J. Innov. Res. Adv. Stud.*, vol. 4, no. 6, pp.  
31 334–338, 2017.  
32  
33 [29] E. Budu *et al.*, "Maternal healthcare utilization and full immunization coverage among 12–23  
34 months children in Benin: a cross sectional study using population-based data," *Arch. Public*  
35 *Heal.*, vol. 79, no. 1, pp. 1–12, 2021, doi: 10.1186/s13690-021-00554-y.  
36  
37  
38  
39  
40  
41  
42  
43  
44  
45  
46  
47  
48  
49  
50  
51  
52  
53  
54  
55  
56  
57  
58  
59  
60

1  
2  
3  
4  
5  
6  
7  
8  
9  
10  
11  
12  
13  
14  
15  
16  
17  
18  
19  
20  
21  
22  
23  
24  
25  
26  
27  
28  
29  
30  
31  
32  
33  
34  
35  
36  
37  
38  
39  
40  
41  
42  
43  
44  
45  
46  
47  
48  
49  
50  
51  
52  
53  
54  
55  
56  
57  
58  
59  
60

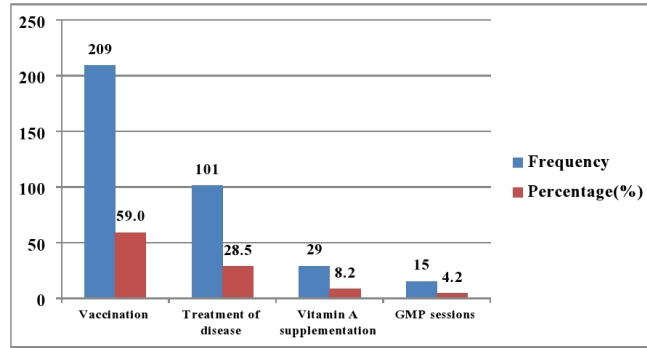

Figure 1: Mothers' most common reason to visit health facility, Mettu town, 2021 (n=354)

449x582mm (72 x 72 DPI)



1  
2  
3  
4  
5  
6  
7  
8  
9  
10  
11  
12  
13  
14  
15  
16  
17  
18  
19  
20  
21  
22  
23  
24  
25  
26  
27  
28  
29  
30  
31  
32  
33  
34  
35  
36  
37  
38  
39  
40  
41  
42  
43  
44  
45  
46  
47  
48  
49  
50  
51  
52  
53  
54  
55  
56  
57  
58  
59  
60

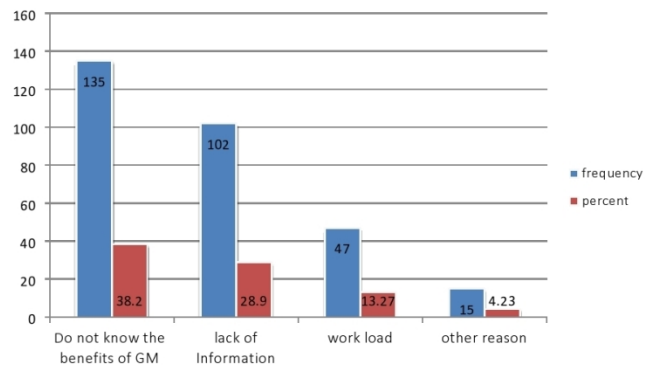

Figure 2: Reasons for not regularly taking the child for GM session, Mettu town 2021(n=354)

449x582mm (72 x 72 DPI)
